# Supplementary material for: Effects of resistance training and/or beta-hydroxy-beta-methylbutyrate supplementation on muscle mass, muscle strength and physical performance in older women with reduced muscle mass: protocol for a randomised, double-blind, placebo-controlled trial
Source: PubMed Central journal article supplement — BMJ Open. 2019 Feb 27;9(2):e025723. doi: 10.1136/bmjopen-2018-025723 (PMC6398682; doi:10.1136/bmjopen-2018-025723), 2019-02-27
Supplement: bmjopen-2018-025723.draft_revisions.pdf [file bmjopen-2018-025723.draft_revisions.pdf]

# BMJ Open

BMJ Open is committed to open peer review. As part of this commitment we make the peer review history of every article we publish publicly available.

When an article is published we post the peer reviewers' comments and the authors' responses online. We also post the versions of the paper that were used during peer review. These are the versions that the peer review comments apply to.

The versions of the paper that follow are the versions that were submitted during the peer review process. They are not the versions of record or the final published versions. They should not be cited or distributed as the published version of this manuscript.

BMJ Open is an open access journal and the full, final, typeset and author-corrected version of record of the manuscript is available on our site with no access controls, subscription charges or pay-per-view fees (<http://bmjopen.bmj.com>).

If you have any questions on BMJ Open's open peer review process please email [editorial.bmjopen@bmj.com](mailto:editorial.bmjopen@bmj.com)

# BMJ Open

**Effects of resistance training and/or beta-hydroxy-beta-methylbutyrate supplementation on muscle mass, muscle strength, and physical performance in older women with reduced muscle mass: protocol for a randomized, double-blind, placebo-controlled trial**

|                               |                                                                                                                                                                                                                                                                                                                                                                                                                                                                                                                                                                      |
|-------------------------------|----------------------------------------------------------------------------------------------------------------------------------------------------------------------------------------------------------------------------------------------------------------------------------------------------------------------------------------------------------------------------------------------------------------------------------------------------------------------------------------------------------------------------------------------------------------------|
| Journal:                      | <i>BMJ Open</i>                                                                                                                                                                                                                                                                                                                                                                                                                                                                                                                                                      |
| Manuscript ID                 | bmjopen-2018-025723                                                                                                                                                                                                                                                                                                                                                                                                                                                                                                                                                  |
| Article Type:                 | Protocol                                                                                                                                                                                                                                                                                                                                                                                                                                                                                                                                                             |
| Date Submitted by the Author: | 29-Jul-2018                                                                                                                                                                                                                                                                                                                                                                                                                                                                                                                                                          |
| Complete List of Authors:     | Osuka, Yosuke; Tokyo Metropolitan Institute of Gerontology, Research Team for Promoting Independence of the Elderly<br>Kojima, Narumi; Tokyo Metropolitan Institute of Gerontology, Research Team for Promoting Independence of the Elderly<br>Wakaba, Kyohsuke; University of Tsukuba, Faculty of Health and Sport Sciences<br>Miyachi, Daiji; Kyowa Co., Ltd<br>Tanaka, Kiyoji; University of Tsukuba, Faculty of Health and Sport Sciences<br>Kim, Hunkyung; Tokyo Metropolitan Institute of Gerontology, Research Team for Promoting Independence of the Elderly |
| Keywords:                     | sarcopenia, exercise and nutrition, muscle mass and strength, physical performance, RCT                                                                                                                                                                                                                                                                                                                                                                                                                                                                              |
|                               |                                                                                                                                                                                                                                                                                                                                                                                                                                                                                                                                                                      |

SCHOLARONE™  
Manuscripts

1  
2  
3  
4  
5 **Effects of resistance training and/or beta-hydroxy-beta-methylbutyrate supplementation on**  
6 **muscle mass, muscle strength, and physical performance in older women with reduced muscle**  
7 **mass: protocol for a randomized, double-blind, placebo-controlled trial**  
8  
9

10 Yosuke Osuka<sup>1</sup>, Narumi Kojima<sup>1</sup>, Kyohsuke Wakaba<sup>2</sup>, Daiji Miyauchi<sup>3</sup>, Kiyoji Tanaka<sup>2</sup>, and  
11 Hunkyung Kim<sup>1</sup>  
12

13 <sup>1</sup>Research Team for Promoting Independence of the Elderly, Tokyo Metropolitan Institute of  
14 Gerontology, Tokyo, Japan  
15

16 <sup>2</sup>Faculty of Health and Sport Sciences, University of Tsukuba, Ibaraki, Japan  
17

18 <sup>3</sup>Kyowa Co., Ltd., Tokyo, Japan.  
19

20  
21 **Corresponding author**

22 Yosuke Osuka, PhD

23 Research Team for Promoting Independence of the Elderly

24 Tokyo Metropolitan Institute of Gerontology

25 35-2, Sakae-cho, Itabshi-ku, Tokyo, 173-0015, Japan  
26

27 E-mail: osuka@tmig.or.jp  
28

29 Phone: +81-3-3964-3241  
30  
31

32 **Word count:** 3836/4000 words  
33  
34  
35  
36  
37  
38  
39  
40  
41  
42  
43  
44  
45  
46  
47  
48  
49  
50  
51  
52  
53  
54  
55  
56  
57  
58  
59  
60

## ABSTRACT

### Introduction

Resistance training (RT) and nutritional supplementation seem to have beneficial effects on muscle properties and physical performance in older adults. However, the reported effects of specific RT programs and supplementation prescriptions vary among studies. The present study aims to examine the acute and residual effects of RT and/or beta-hydroxy-beta-methylbutyrate (HMB) supplementation on muscle mass, muscle strength, and physical performance in older women with reduced muscle mass.

### Methods and analysis

This is a randomized, double-blind, placebo-controlled trial. Older women fitting the eligibility criteria were recruited in February 2018 from a population-based sample identified via a screening conducted in October 2017. In March 2018, the 156 participants were randomly allocated to undergo one of four interventions (RT+HMB, RT+placebo, education+HMB, and education+placebo) for 12 weeks. Supervised RT consisted of body weight, elastic band, ankle weight, and machine-based exercises twice weekly at the Tokyo Metropolitan Institute of Gerontology. Each participant ingested HMB (1,200 mg) or placebo supplements once daily. Sessions of education not associated with sarcopenia treatment were conducted every two weeks. Post-intervention follow-up will be conducted for 12 weeks, until September 2018. The study includes assessments conducted in March (baseline), June (post-intervention), and September 2018 (follow-up). The primary outcome is the longitudinal change in muscle mass. Secondary outcomes include the longitudinal changes in muscle strength, physical performance, muscle thickness, muscle quality, blood counts, blood biochemistry, calf circumference, skin viscoelasticity, habitual dietary intake, habitual physical activity levels, functional capacity, and health-related quality of life. Intention-to-treat analyses will be conducted.

### Ethics and dissemination

The study protocol was approved by the Ethics Committee of the Tokyo Metropolitan Institute of Gerontology, Japan. The study is being conducted according to the principles of the Declaration of Helsinki. The findings will be presented at international academic congresses and published in peer-reviewed international journals.

### Registration

UMIN000028560; pre-results.

**STRENGTHS AND LIMITATIONS OF THIS STUDY**

- To the best of our knowledge, this will be the first study to examine the effects of resistance training and/or HMB supplementation among older women with reduced muscle mass.
- The study will collect information about the residual effects of the intervention over an observation period of 12 weeks.
- The trial has a randomized, double-blind, placebo-controlled design, which supports the generalizability of the findings and minimizes the risk of selection, performance, and detection bias.
- The trial will involve resistance training using body weight, ankle weights, and elastic bands, which will not provide objective information regarding muscle loading but represents a more suitable prescription for older adults and is more feasible as an exercise routine to be performed on a daily basis.
- All participants will be older women, which limits generalization of the findings to men.

## INTRODUCTION

Sarcopenia is a syndrome characterised by progressive and generalized loss of skeletal muscle mass and strength.<sup>[1]</sup> In older adults, sarcopenia is associated with adverse health outcomes such as increased risk of incident falls,<sup>[2]</sup> reduced performance in instrumental or basic activities of daily living, hospitalization, institutionalization, and mortality.<sup>[3-4]</sup> To reduce the social burden of sarcopenia, it is important to develop prevention and treatment programs aimed to extend healthy life expectancy especially in older people with high risk of sarcopenia.

Most sarcopenia prevention or treatment programs recommend a combination of resistance training (RT) and nutritional supplementation.<sup>[5-7]</sup> According to a meta-analysis of nine randomized control trials (RCTs) on the combined effect of protein supplementation and RT on muscle outcomes, such strategies may be effective for increasing fat-free mass among older adults.<sup>[8]</sup> Both the European Working Group on Sarcopenia in Older People and the International Working Group on Sarcopenia, which serve as international advisory committees on sarcopenia, have argued in favour of leucine and beta-hydroxy-beta-methylbutyrate (HMB) supplementation as complementary strategies for sarcopenia prevention or treatment.<sup>[9]</sup>

HMB is synthesized in skeletal muscle via transamination of leucine to alpha-ketoisocaproic acid (KIC) by aminotransferase.<sup>[10]</sup> It is estimated that only 5–10% of KIC is metabolized by KIC dioxygenase to produce HMB in the liver.<sup>[11]</sup> HMB supplementation is believed to exert beneficial effects on skeletal muscle by increasing protein synthesis through activation of the mammalian target of rapamycin and by decreasing protein catabolism through down-regulation of the ubiquitin proteasome pathway.<sup>[12]</sup> Wu et al. reviewed the results of seven RCTs on the effects of HMB supplementation on muscle outcomes and concluded that HMB may contribute to preservation of muscle mass in older adults.<sup>[13]</sup> However, to our knowledge, few studies have examined the combined effect of RT and HMB supplementation on skeletal muscle.<sup>[14-15]</sup> Additionally, the acute and residual effects of RT and/or HMB supplementation on muscle outcomes in older people with reduced muscle mass remain unclear. Thus, there is a need for studies on the combined effect of nutrition and exercise in older populations with physical frailty, and such studies should be designed as four-arm RCTs (exercise-only, nutrition-only, both, and none).<sup>[9]</sup>

The present study aims to examine the acute and residual effects of RT and/or HMB supplementation on muscle mass, muscle strength, and physical performance in older women with reduced muscle mass. We hypothesized that, compared to RT alone, HMB supplementation alone, and placebo, combined RT and HMB supplementation would provide higher benefit in terms of improving and maintaining muscle mass, muscle strength, and physical performance. These findings will provide new evidence regarding the effectiveness of non-pharmaceutical interventions for sarcopenia, and will be useful in the development of sarcopenia prevention and treatment programs in physically frail populations.

## METHODS AND ANALYSIS

### Study design, procedure, and ethics

In accordance with the SPIRIT (Standard Protocol Items: Recommendations for Interventional Trials) and CONSORT (Consolidated Standards of Reporting Trials) statements, we designed a randomized, double-blind, placebo-controlled trial to be conducted between March and September 2018 at the Tokyo Metropolitan Institute of Gerontology (TMIG), Tokyo, Japan. The study protocol was registered with the University Hospital Medical Information Network Clinical Trials Registry (UMIN-CTR) on 7 August 2017 (trial registration no. UMIN000028560) and was approved by the Ethics Committee of the TMIG on 15 September 2017.

Older women fitting the eligibility criteria were recruited in February 2018, from among a population-based sample identified via a screening conducted in October 2017. After recruitment, a four-arm intervention was conducted between March and June 2018. The participants will be followed until September 2018 to observe the residual effects of the intervention. After the observation period, all interventions will be available to all participants, in agreement with ethical principles. Amendments to the protocol will be disclosed on the UMIN-CTR page of the trial. The study involves assessments conducted in March (baseline), June (post-intervention), and September 2018 (follow-up). Before the baseline assessment, all participants have received written and oral information from the researchers (YO, NK, and KH) regarding the study purpose, procedures, confidentiality of personal information, possible benefits, possible risks, and coping strategy for the risks. Only participants who provided written informed consent proceeded within the trial (assessments and interventions). The flow chart of the study is shown in Figure 1.

### Participants

To select the study sample, a population-based comprehensive geriatric survey was conducted as screening assessment at the TMIG in October 2017. Invitation letters for the screening assessment were sent to 6,366 subjects randomly selected from the Basic Resident Register of the Itabashi ward, which is a special ward located in the northwest area of Tokyo. In total, 1,035 older women participated in the screening assessment. The inclusion criteria of this study were: (i) age  $\geq 65$  years; (ii) reduced muscle mass, defined as a skeletal muscle index  $<5.7$  kg/m<sup>2</sup>, per the sarcopenia diagnosis consensus issued by the Asian Working Group for Sarcopenia; and (iii) informed consent for undergoing screening. The exclusion criteria were: (i) exercise restriction issued by a medical doctor; (ii) use of other supplements known to increase muscle mass; (iii) impaired cardiac, kidney, or liver function; and (iv) judged as ineligible by a medical doctor. A sample of 328 women fitting the eligibility criteria received invitation letters regarding the study intervention, of whom 156 participated in the baseline assessment.

### **Randomization, allocation concealment, and blinding**

A baseline assessment was conducted in March 2018. Afterwards, the participants were randomly allocated to four groups in a ratio of 1:1:1:1 based on a computer-generated randomization number. The allocation was conducted by two researchers from the University of Tsukuba (KW and KT). The allocation keys will be blinded from the researchers at the TMIG (YO, NK, and HK), participants, exercise trainer, analysts, and assessors until December 2018 in order to maintain allocation concealment. The researchers holding the allocation keys will not have contact with the participants.

### **Intervention**

During the intervention and observational periods, all participants were instructed not to change their habitual dietary intake or physical activity levels (i.e., those reported during the baseline assessment in March 2018).

#### **RT program**

Participants allocated to the RT program took part in 60-min exercise sessions on two non-consecutive days per week for 12 weeks. All sessions took place at the TMIG, under the supervision of a well-experienced exercise trainer who was not one of the researchers associated with the study. Each exercise session consisted of a 5-min warm-up exercise, a 50-min RT exercise, and a 5-min cool-down exercise. Warm-up and cool-down exercises included stretching activities for the shoulders, trunk, chest, hips, and hamstrings. RT consisted of chair-based (weeks 1–12), elastic band (weeks 5–7), ankle weight (weeks 7–12), and machine-based exercises (weeks 9–12). The chair-based exercise included heel raise, toe raise, knee extension, hip adduction using a rubber ball, and knee lift exercises from the sitting position, as well as squats. Additionally, heel raise and knee lift exercises were performed progressively from a seated to a standing position, and lateral leg raise exercises were performed while standing behind the chair and holding onto the back of the chair. Elastic band exercises included knee lift, hip adduction, and arm rowing exercises. Knee extension exercises in sitting position, as well as heel raise, knee lift, and lateral leg raise exercises in standing position also were performed using ankle weights of 0.5, 0.75, 1.0, or 1.5 kg, according to the physical condition of each participant. In the last 4 weeks of the intervention, the participants performed five types of exercise (arm rowing, leg extension, hip lateral rotation, leg press, and trunk flexion) using dedicated RT machines (Mizuno Ltd., Tokyo, Japan). Each type of movement was performed in 1–3 sets of 8–10 repetitions, with the first four counts being performed with increasing strength and the last four with decreasing strength. The exercise trainer supervised the participants and provided verbal feedback to ensure sufficient tension was achieved in the target muscle groups. Exercise intensity was maintained at 12–14 points on the Borg Rate of Perceived Exertion scale.



1  
2  
3  
4  
5 This RT program was based on a program employed successfully in our previous studies.<sup>[16-18]</sup>  
6  
7

#### 8 HMB and placebo supplementation

9 All participants were instructed to ingest active or placebo products provided by Kyowa Co., Ltd.,  
10 Tokyo, Japan. The active products contain 30 mg of protein, 20 mg of fat, 3,500 mg of carbohydrates,  
11 0.2 mg of sodium, 207 mg of calcium, and 1,200 mg of HMB. Placebo products do not include  
12 calcium or HMB, and the missing amounts are provided as carbohydrates. Both products are  
13 provided in powder form with the same flavour, appearance, and packaging. The two researchers  
14 (KW and KT) maintaining the allocation keys labelled the package with an identification code and  
15 sent the products to the researchers at the TMIG (YO, NK, and HK). The participants received the  
16 blinded product, which they were instructed mix with 200 mL of water and ingest once a day after  
17 any meal. The participants were instructed to record the ingestion of products in a diary.  
18  
19

20 While there are no clear recommendations regarding HMB supplementation, Wu et al. suggested a  
21 daily dose of 3,000 mg for older adults.<sup>[13]</sup> However, as body weight is lower among sarcopenic  
22 Japanese older women than among western older women,<sup>[16 19 20]</sup> we set the active dose at 1,200 mg  
23 HMB daily. No adverse events associated with HMB supplementation have been reported.<sup>[21]</sup>  
24  
25  
26  
27  
28

#### 29 Health education program

30 Participants allocated to the health education groups took part in six 60-min sessions (once every  
31 two weeks for 12 weeks) of health education not related to sarcopenia prevention but focused  
32 specifically on dementia prevention, prevention of bank transfer fraud, music therapy, nutrition and  
33 general health, oral care, and social education, each given at the TMIG by an expert in that field.  
34  
35  
36  
37

#### 38 Assessments

39 This study includes assessments conducted in March (baseline), June (post-intervention), and  
40 September 2018 (follow-up) at the TMIG. All assessors are TMIG employees who are not  
41 researchers and are blinded to group allocation.  
42  
43  
44

#### 45 Body composition

46 Body composition assessments involve measuring the following muscle mass indices: whole-body  
47 fat-free mass; upper-extremity and lower-extremity lean mass; appendicular lean mass, as the sum of  
48 the upper- and lower-extremity lean mass; and skeletal mass index, as the appendicular lean mass  
49 divided by the height squared (kg/m<sup>2</sup>).<sup>[22]</sup> The body weight, fat mass, and percent fat are also  
50 obtained. Body composition measurements are conducted using the InBody720 device (Biospace  
51 Co., Ltd, Seoul, Korea), which has a validity for estimating appendicular lean mass in  
52 community-dwelling older populations in comparison of dual-energy X-ray absorptiometry  
53  
54  
55  
56  
57  
58  
59  
60

1  
2  
3  
4  
5 systems.<sup>[23]</sup>  
6  
7

## 8 Muscle strength

### 9 *Knee extensor strength*

10 Peak isometric knee extensor strength in the dominant leg is measured in a sitting position. The  
11 assessor places the hand-held dynamometer ( $\mu$ Tas F-1; ANIMA, Tokyo, Japan) on the skin above the  
12 anterior ankle, at a level 5 cm above the tip of the lateral malleolus. The participants are instructed to  
13 extend the knee with maximum power starting from a knee joint angle of 90°.<sup>[24]</sup> After a few practice  
14 repetitions, the participants are measured twice, and the best result is retained.  
15  
16

### 17 *Hip adductor strength*

18 Peak isometric hip adduction strength is also measured in a sitting position. The assessor places the  
19 hand-held dynamometer ( $\mu$ Tas F-1; ANIMA) at 3 cm proximal to the medial knee fissure and  
20 instructs the participant to exert maximal hip adduction force while compressing a 12-cm rod  
21 equipped with a dynamometer, keeping both knee joints at 90°.<sup>[25]</sup> After a few practice repetitions,  
22 the participants are measured twice, and the best result is retained.  
23  
24

### 25 *Handgrip strength*

26 Handgrip strength is measured using a hand-held Smedley-type dynamometer. The participants are  
27 instructed to stand naturally, grip the device with their dominant hand, and squeeze as hard as  
28 possible.<sup>[26]</sup> The best result of two trials is retained.  
29  
30  
31

## 32 Physical performance

### 33 *Usual and maximal gait speed*

34 Using a stopwatch, the usual and maximal gait speed are measured as the time taken to walk 5 m  
35 (between markers set at 3 m and 8 m of an 11-m walking path)<sup>[26]</sup> at the usual or maximal speed,  
36 respectively. Usual gait speed is measured once. Maximal gait speed is measured twice, and the best  
37 result is retained.  
38  
39

### 40 *Timed up-and-go*

41 This test measures the time taken to stand up from the chair, walk to and around a marker placed 3 m  
42 away, return to the chair, and sit back down.<sup>[27]</sup> The participants are instructed to perform these  
43 movements as quickly as possible. The test is performed twice, and the best result is retained.  
44  
45

### 46 *Five-repetition sit-to-stand*

47 This test measures the time taken to stand up from the chair until full knee and hip extension, sit  
48 back down, and repeat this movement five times as quickly as possible.<sup>[28]</sup> The participants are  
49 instructed to fold their arms across the chest, stand-up completely, and make firm contact when  
50 sitting. After a few practice repetitions, the test is performed twice, and the best result is retained.  
51  
52  
53  
54  
55  
56

### Muscle thickness and quality

Muscle thickness is measured using a B-mode ultrasound device (Mysono U6; Samsung Medison, Seoul, Korea). The participants are instructed to lie on the back in a bed and extend the hip and knee until fully relaxed. The assessor performs a transverse scan by placing a linear probe (5–12 MHz) on the skin surface at the midpoint between the lateral epicondyle and the ipsilateral greater trochanter of the femur, perpendicular to the longitudinal axis of the quadriceps femoris muscle. To measure the thickness of the rectus femoris and vastus intermedius, an electronic calliper is used. Quadriceps femoris thickness is defined as the sum between the thickness of the rectus femoris and that of the vastus intermedius. The muscle quality of the rectus femoris is evaluated on ultrasound images processed using dedicated software (Adobe Photoshop CS6 version 13.0; Adobe Systems, San Jose, CA, USA) and is expressed as the brightness of the image on a scale from 0 (black) to 256 (white). The protocol for assessing muscle thickness and quality is described in detail elsewhere.<sup>[29]</sup>

### Blood biochemistry

Blood samples are collected from the antecubital vein. Analyses are carried out centrally in one laboratory (Health Sciences Research Institute, Inc., Kanagawa, Japan). Enzymatic methods are used to determine creatinine, cholesterol (total, high-density lipoprotein, low-density lipoprotein), triglyceride, blood glucose, and glycated haemoglobin levels. Reference methods recommended by the Japan Society of Clinical Chemistry are used to assess aspartate transaminase, alanine transaminase, lactate dehydrogenase, and creatinine kinase levels. Other assays include the urease method with glutamate dehydrogenase (for blood urea nitrogen), direct colorimetry (for Fe), flow cytometry (for white blood cells), erythrocyte fragility test (for red blood cells), sodium lauryl sulphate method (for haemoglobin), microhematocrit method (for haematocrit), latex agglutination turbidimetry (for cystatin C), nephelometric immunoassay (for high-sensitivity C-reactive protein), immunoradiometric assay (for insulin-like growth factor-1), and chemiluminescence immunoassay (for vitamin B12).

### Anthropometric indices

The body mass index ( $\text{kg}/\text{m}^2$ ) is calculated as the body weight divided by the body height squared. Plastic tape is used to measure the calf circumference in the non-dominant leg.

### Skin viscoelasticity

Skin viscoelasticity is evaluated using the Cutometer<sup>®</sup> dual MPA 580 (Courage + Khazaka electronic GmbH, Cologne, Germany), which measures the elasticity of the upper layer of the skin using negative pressure to induce mechanical deformation; such measurements are useful for quantitative evaluation of age-related changes in skin elasticity.<sup>[30 31]</sup> The displacement of the skin at the aperture

1  
2  
3  
4  
5 of the Cutometer<sup>®</sup> probe is measured optically, and the resistance of the upper skin layer to the  
6 applied negative pressure and the ability to return to the original position are displayed as curves in  
7 real time (penetration depth as a function of time). Skin viscoelasticity is assessed for the skin of the  
8 cheek. The participants are instructed to refrain from using makeup on the day of the assessment.  
9 The test is performed five times with 10-sec intervals, and the average result is retained.  
10  
11

#### 12 13 14 Habitual dietary intake

15 Habitual dietary intake is measured using a brief-type self-administered diet history questionnaire,  
16 which has been validated for estimating the monthly energy intake and the intake of each nutrient  
17 factor (protein, fat, carbohydrate, and calcium) in older adults.<sup>[32 33]</sup> These calculations are performed  
18 exclusively using software provided by Gender Medical Research Co., Ltd., Tokyo, Japan. Habitual  
19 dietary intake evaluations are conducted to determine whether the participants changed their dietary  
20 patterns over the course of the intervention.  
21  
22

#### 23 24 25 Habitual physical activity

26 Habitual physical activity levels (metabolic equivalent-minutes/week) are assessed using the  
27 International Physical Activity Questionnaire, which has good reliability and validity for estimating  
28 daily physical activity levels.<sup>[34 35]</sup> We calculate total scores and the scores for each of the four  
29 physical activity domains (leisure time, domestic and gardening, occupational, and transport-related  
30 physical activity). Habitual physical activity evaluations are conducted to determine whether the  
31 participants changed their physical activity patterns over the course of the intervention.  
32  
33  
34  
35

#### 36 37 38 Functional capacity

39 Functional capacity is assessed in terms of the instrumental self-maintenance (five items),  
40 intellectual activities (four items), and social roles (four items) subscales of the TMIG index of  
41 competence. The validity and reliability of the face-to-face assessment of the TMIG index of  
42 competence have been demonstrated previously.<sup>[36]</sup> Participants are asked whether or not they are  
43 able to perform the function described by each item, to which they may answer either “yes” (able to  
44 do so, 1 point) or “no” (unable to do so, 0 points), for a maximum total score of 13 points, with a  
45 higher score indicating better functional capacity.  
46  
47  
48

#### 49 50 51 Health-related quality of life (HR-QoL)

52 HR-QoL is assessed using the World Health Organization-Five Well-Being Index, which has good  
53 validity for assessing mental condition in older adults, and consists of five items representing mood  
54 in daily life over the preceding two weeks.<sup>[37]</sup> The participants are instructed to rate the frequency of  
55 the mood from 0 (never) to 5 (all the time), for a maximum score of 25 points, with a higher score  
56  
57  
58  
59  
60

1  
2  
3  
4  
5 indicating better mental condition.  
6  
7

### 8 **Assessment of adverse events and adherence**

9 If any adverse events associated with RT or supplements occur during the intervention period, the  
10 information is recorded and the program discontinued immediately. We assess the adherence to the  
11 intervention including RT participation rate and adherence to the daily use of the assigned  
12 supplement (based on the participants' daily diary of study product intake). If a participant drops out  
13 from the program, the reasons are recorded.  
14  
15

### 16 **Outcome measures**

17 The primary outcome measure is muscle mass. Secondary outcome measures include muscle  
18 strength, physical performance, muscle thickness, muscle quality, blood counts, blood biochemistry,  
19 calf circumference, skin viscoelasticity, habitual dietary intake, habitual physical activity levels,  
20 functional capacity, and HR-QoL.  
21  
22  
23  
24  
25

### 26 **Sample size**

27 A previous study on exercise and supplementation in community-dwelling older Japanese women  
28 with sarcopenia revealed a between-group difference of  $3.1\pm 3.2\%$  in lower-extremity muscle  
29 mass.<sup>[16]</sup> Power calculation was conducted using PS Power and Sample Size Calculation version 3.0  
30 (Vanderbilt University, Tennessee, USA).<sup>[38]</sup> Setting the two-sided  $\alpha$ -error to 0.01 (Bonferroni  
31 correction for multiple comparisons as post-hoc tests) and power to 90%, the minimum sample size  
32 required to detect clinically important differences was 33 participants per group. Considering 15–  
33 18% attrition, we aimed to enrol at most 160 participants.  
34  
35  
36  
37  
38

### 39 **Statistical analysis**

40 To promote the collection of quality data, the collected data will be double-checked by the assessors,  
41 and a statistician will check the range of values. Between-group comparisons of baseline  
42 characteristics will be conducted using one-way analysis of variance or the Kruskal-Wallis test for  
43 continuous variables, and the chi-square test for categorical variables. Continuous data will be  
44 expressed as mean and standard deviation or median and interquartile range. The longitudinal  
45 changes in main and secondary outcomes from baseline to post-intervention across four groups will  
46 form the primary focus of the analysis. Mixed-model repeated-measures analysis of variance with  
47 adjustment for baseline variables will be applied to test for interactions between group and time  
48 effect. For group and time interactions with  $P < 0.05$ , we will apply multiple comparison analyses to  
49 test five hypotheses, namely that longitudinal changes differ significantly as follows: for RT+HMB  
50 vs. RT+placebo, education+HMB, or education+placebo; for RT+placebo vs. education+placebo;  
51 vs. education+HMB, or education+placebo; for RT+placebo vs. education+placebo;  
52 vs. education+HMB, or education+placebo; for RT+placebo vs. education+placebo;  
53 vs. education+HMB, or education+placebo; for RT+placebo vs. education+placebo;  
54 vs. education+HMB, or education+placebo; for RT+placebo vs. education+placebo;  
55 vs. education+HMB, or education+placebo; for RT+placebo vs. education+placebo;  
56 vs. education+HMB, or education+placebo; for RT+placebo vs. education+placebo;  
57 vs. education+HMB, or education+placebo; for RT+placebo vs. education+placebo;  
58 vs. education+HMB, or education+placebo; for RT+placebo vs. education+placebo;  
59 vs. education+HMB, or education+placebo; for RT+placebo vs. education+placebo;  
60 vs. education+HMB, or education+placebo; for RT+placebo vs. education+placebo;

1  
2  
3  
4  
5 and for education+HMB vs. education+placebo. Bonferroni correction will be applied to adjust for  
6 these comparisons. The results will be presented as least-squares-adjusted means and standard errors.  
7 Within-group changes will be analysed using mixed-model repeated-measures analysis of variance.  
8 For subgroup analysis, the participants will be stratified according to sarcopenia status, as defined  
9 based on the Asian Working Group for Sarcopenia criteria. The intention-to-treat principle will be  
10 applied in all analyses. Missing data will be applied multiple imputation. All statistical analyses will  
11 be performed using SPSS version 25.0 (IBM Corp., Armonk, NY, USA) or Stata (StataCorp LLC,  
12 College Station, TX, USA). *P*-values < 0.05 will be considered to indicate significance.  
13  
14  
15  
16  
17  
18

### 19 **ETHICS AND DISSEMINATION**

20 The study protocol was approved by the Ethics Committee of the TMIG, and will be conducted in  
21 agreement with the Declaration of Helsinki. The findings of this study will be presented at  
22 international academic congresses and published in peer-reviewed international journals. Upon  
23 publication in a journal, we will also make the findings available on the TMIG homepage.  
24  
25  
26  
27  
28

### 29 **DISCUSSION**

30 This study addresses the paucity of data regarding the effects of RT and/or HMB supplementation in  
31 older women with reduced muscle mass, and the findings will provide insight regarding the potential  
32 synergistic effect of RT and HMB supplementation on muscle mass, muscle strength, and physical  
33 performance. We will also examine the residual effects of such interventions over a 12-week  
34 observation period, and such findings may help understand the potential of non-pharmaceutical  
35 treatment for sarcopenia.  
36  
37  
38

39 Literature reports regarding the individual effect of HMB supplementation on muscle properties and  
40 physical performance in older people are encouraging.<sup>[19 20 39]</sup> However, to our knowledge, only two  
41 studies have evaluated the combined effect of RT and HMB supplementation in older populations.<sup>[14</sup>  
42 <sup>15]</sup> Specifically, Vukovich et al. enrolled 31 adults aged >70 years and reported significant muscle  
43 mass gain after 12 weeks of exercise with HMB supplementation but not after exercise with placebo  
44 (*P* for interaction, 0.08).<sup>[14]</sup> On the other hand, Stout et al. enrolled 36 adults aged >65 years and  
45 reported significant improvement in muscle quality, calculated as muscle strength relative to muscle  
46 mass, after 24 weeks of HMB supplementation alone (i.e., no exercise).<sup>[15]</sup> It remains unclear  
47 whether the combined program provides higher benefits. These previous studies had a relatively  
48 small sample size, which might increase  $\beta$ -error; moreover, the participants were relatively healthy  
49 and had almost normal muscle mass, suggesting that they may have benefited less from HMB  
50 supplementation. As completely controlled groups were not previously included, the potential  
51  
52  
53  
54  
55  
56  
57  
58  
59  
60

1  
2  
3  
4  
5 synergy between RT and HMB supplementation remains unclear. The present study will address  
6 these limitations and serve as the first investigation of the acute and residual independent and  
7 combined effects of RT and HMB supplementation, which will be conducted in a larger sample of  
8 older adults with reduced muscle mass. The randomized, double-blind, placebo-controlled design  
9 will minimize the risk of selection, performance, and detection bias, and will support the  
10 generalizability of the results. One limitation is that this study will involve RT using body weight,  
11 elastic bands, and ankle weights, which does not provide objective information regarding muscle  
12 loading; on the other hand, such RT programs are more suitable for older adults and will be more  
13 feasible in daily practice. Another limitation is that all participants will be older women, which will  
14 preclude generalization of our findings to men.  
15  
16  
17  
18  
19  
20  
21  
22  
23  
24  
25  
26  
27  
28  
29  
30  
31  
32  
33  
34  
35  
36  
37  
38  
39  
40  
41  
42  
43  
44  
45  
46  
47  
48  
49  
50  
51  
52  
53  
54  
55  
56  
57  
58  
59  
60

## DISCLOSURES

### Acknowledgments

We are grateful to the participants and the staff members of the Tokyo Metropolitan Institute of Gerontology.

### Authors' contributions

YO and HK conceived the study, designed the study protocol, participated in the coordination of the study (recruitment and screening), and wrote the manuscript. NK participated in the coordination of the study and helped manage data collection. KW and TK contributed to designing the study protocol, conducted the randomization, and have been maintaining allocation concealment. DM contributed to designing the study protocol and negotiated a contract. All authors read and approved the final manuscript. HK is principal investigator in this trial.

### Funding and competing interests

This study is financially supported by Kyowa Co., Ltd., Tokyo, Japan (no grant number) and is being conducted as a joint research effort of the Tokyo Metropolitan Institute of Gerontology, University of Tsukuba, and Kyowa Co., Ltd. The intervention products (HMB and placebo supplements) were provided by Kyowa Co., Ltd. DM is employed by Kyowa Co., Ltd. The funder is not involved in subject recruitment, intervention, data collection, data analysis, or preparation of the manuscript.

### Patient consent

Obtained.

### Ethics approval

Approved by the Ethics Committee of the Tokyo Metropolitan Institute of Gerontology on 15 September 2017.

### Data sharing statement

Data collection is ongoing and will be handled anonymously. The results will be offered for publication in a peer-reviewed journal and, afterwards, will be available on the TMIG website.



**REFERENCES**

1. Cruz-Jentoft AJ, Baeyens JP, Bauer JM, et al. Sarcopenia: European consensus on definition and diagnosis: report of the European Working Group on Sarcopenia in Older People. *Age Ageing* 2010;39(4):412-23.
2. Landi F, Liperoti R, Russo A, et al. Sarcopenia as a risk factor for falls in elderly individuals: results from the ilSIRENTE study. *Clin Nutr* 2012;31(5):652-8.
3. Hirani V, Blyth F, Naganathan V, et al. Sarcopenia is associated with incident disability, institutionalization, and mortality in community-dwelling older men: the Concord Health and Ageing in Men Project. *J Am Med Dir Assoc* 2015;16(7):607-13.
4. Bianchi L, Ferrucci L, Cherubini A, et al. The predictive value of the EWGSOP definition of sarcopenia: results from the InCHIANTI study. *J Gerontol A Biol Sci Med Sci* 2016;71(2):259-64.
5. Cermak NM, Res PT, de Groot LC, et al. Protein supplementation augments the adaptive response of skeletal muscle to resistance-type exercise training: a meta-analysis. *Am J Clin Nutr* 2012;96(6):1454-64.
6. Malafarina V, Uriz-Otano F, Iniesta R, et al. Effectiveness of nutritional supplementation on muscle mass in treatment of sarcopenia in old age: a systematic review. *J Am Med Dir Assoc* 2013;14(1):10-7.
7. Liao CD, Tsao JY, Wu YT, et al. Effects of protein supplementation combined with resistance exercise on body composition and physical function in older adults: a systematic review and meta-analysis. *Am J Clin Nutr* 2017;106(4):1078-91.
8. Finger D, Goltz FR, Umpierre D, et al. Effects of protein supplementation in older adults undergoing resistance training: a systematic review and meta-analysis. *Sports Med* 2015;45(2):245-55.
9. Cruz-Jentoft AJ, Landi F, Schneider SM, et al. Prevalence of and interventions for sarcopenia in ageing adults: a systematic review. Report of the International Sarcopenia Initiative (EWGSOP and IWGS). *Age Ageing* 2014;43(6):748-59.
10. Wilson JM, Fitschen PJ, Campbell B, et al. International Society of Sports Nutrition Position Stand: beta-hydroxy-beta-methylbutyrate (HMB). *J Int Soc Sports Nutr* 2013;10(1):6.
11. Van Koeveing M, Nissen S. Oxidation of leucine and alpha-ketoisocaproate to beta-hydroxy-beta-methylbutyrate in vivo. *Am J Physiol* 1992;262(1 Pt 1):E27-31.
12. Fitschen PJ, Wilson GJ, Wilson JM, et al. Efficacy of beta-hydroxy-beta-methylbutyrate supplementation in elderly and clinical populations. *Nutrition* 2013;29(1):29-36.
13. Wu H, Xia Y, Jiang J, et al. Effect of beta-hydroxy-beta-methylbutyrate supplementation on muscle loss in older adults: a systematic review and meta-analysis. *Arch Gerontol Geriatr* 2015;61(2):168-75.

14. Vukovich MD, Stubbs NB, Bohlken RM. Body composition in 70-year-old adults responds to dietary beta-hydroxy-beta-methylbutyrate similarly to that of young adults. *J Nutr* 2001;131(7):2049-52.
15. Stout JR, Smith-Ryan AE, Fukuda DH, et al. Effect of calcium beta-hydroxy-beta-methylbutyrate (CaHMB) with and without resistance training in men and women 65+yrs: a randomized, double-blind pilot trial. *Exp Gerontol* 2013;48(11):1303-10.
16. Kim HK, Suzuki T, Saito K, et al. Effects of exercise and amino acid supplementation on body composition and physical function in community-dwelling elderly Japanese sarcopenic women: a randomized controlled trial. *J Am Geriatr Soc* 2012;60(1):16-23.
17. Kim H, Suzuki T, Kim M, et al. Effects of exercise and milk fat globule membrane (MFGM) supplementation on body composition, physical function, and hematological parameters in community-dwelling frail Japanese women: a randomized double blind, placebo-controlled, follow-up trial. *PLoS One* 2015;10(2):e0116256.
18. Kim H, Kim M, Kojima N, et al. Exercise and nutritional supplementation on community-dwelling elderly Japanese women with sarcopenic obesity: a randomized controlled trial. *J Am Med Dir Assoc* 2016;17(11):1011-19.
19. Flakoll P, Sharp R, Baier S, et al. Effect of beta-hydroxy-beta-methylbutyrate, arginine, and lysine supplementation on strength, functionality, body composition, and protein metabolism in elderly women. *Nutrition* 2004;20(5):445-51.
20. Baier S, Johannsen D, Abumrad N, et al. Year-long changes in protein metabolism in elderly men and women supplemented with a nutrition cocktail of beta-hydroxy-beta-methylbutyrate (HMB), L-arginine, and L-lysine. *JPEN J Parenter Enteral Nutr* 2009;33(1):71-82.
21. Nissen S, Sharp RL, Panton L, et al.  $\beta$ -hydroxy- $\beta$ -methylbutyrate (HMB) supplementation in humans is safe and may decrease cardiovascular risk factors. *J Nutr* 2000;130(8):1937-45.
22. Janssen I, Baumgartner RN, Ross R, et al. Skeletal muscle cutpoints associated with elevated physical disability risk in older men and women. *Am J Epidemiol* 2004;159(4):413-21.
23. Kim M, Shinkai S, Murayama H, et al. Comparison of segmental multifrequency bioelectrical impedance analysis with dual-energy X-ray absorptiometry for the assessment of body composition in a community-dwelling older population. *Geriatr Gerontol Int* 2015;15(8):1013-22.
24. Kojima N, Kim H, Saito K, et al. Association of knee-extension strength with instrumental activities of daily living in community-dwelling older adults. *Geriatr Gerontol Int* 2014;14(3):674-80.
25. Kim H, Suzuki T, Yoshida Y, et al. Effectiveness of multidimensional exercises for the treatment of stress urinary incontinence in elderly community-dwelling Japanese women: a randomized, controlled, crossover trial. *J Am Geriatr Soc* 2007;55(12):1932-9.

- 1
  - 2
  - 3
  - 4
  - 5
  - 6
  - 7
  - 8
  - 9
  - 10
  - 11
  - 12
  - 13
  - 14
  - 15
  - 16
  - 17
  - 18
  - 19
  - 20
  - 21
  - 22
  - 23
  - 24
  - 25
  - 26
  - 27
  - 28
  - 29
  - 30
  - 31
  - 32
  - 33
  - 34
  - 35
  - 36
  - 37
  - 38
  - 39
  - 40
  - 41
  - 42
  - 43
  - 44
  - 45
  - 46
  - 47
  - 48
  - 49
  - 50
  - 51
  - 52
  - 53
  - 54
  - 55
  - 56
  - 57
  - 58
  - 59
  - 60
26. Shinkai S, Watanabe S, Kumagai S, et al. Walking speed as a good predictor for the onset of functional dependence in a Japanese rural community population. *Age Ageing* 2000;29(5):441-6.
27. Podsiadlo D, Richardson S. The timed "Up & Go": a test of basic functional mobility for frail elderly persons. *J Am Geriatr Soc* 1991;39(2):142-8.
28. Bohannon RW, Bubela DJ, Magasi SR, et al. Sit-to-stand test: performance and determinants across the age-span. *Isokinet Exerc Sci* 2010;18(4):235-40.
29. Nishihara K, Kawai H, Hayashi H, et al. Frequency analysis of ultrasonic echo intensities of the skeletal muscle in elderly and young individuals. *Clin Interv Aging* 2014;9:1471-8.
30. Takema Y, Yorimoto Y, Kawai M, et al. Age-related changes in the elastic properties and thickness of human facial skin. *Br J Dermatol* 1994;131(5):641-8.
31. Ryu HS, Joo YH, Kim SO, et al. Influence of age and regional differences on skin elasticity as measured by the Cutometer. *Skin Res Technol* 2008;14(3):354-8.
32. Kobayashi S, Murakami K, Sasaki S, et al. Comparison of relative validity of food group intakes estimated by comprehensive and brief-type self-administered diet history questionnaires against 16 d dietary records in Japanese adults. *Public Health Nutr* 2011;14(7):1200-11.
33. Kobayashi S, Honda S, Murakami K, et al. Both comprehensive and brief self-administered diet history questionnaires satisfactorily rank nutrient intakes in Japanese adults. *J Epidemiol* 2012;22(2):151-9.
34. Craig CL, Marshall AL, Sjoström M, et al. International physical activity questionnaire: 12-country reliability and validity. *Med Sci Sports Exerc* 2003;35(8):1381-95.
35. Murase N, Katsumura T, Ueda C, et al. [Validity and reliability of Japanese version of International Physical Activity Questionnaire]. *Journal of Health and Welfare Statistics* 2002;49(11):1-9.
36. Koyano W, Shibata H, Nakazato K, et al. Measurement of competence: reliability and validity of the TMIG Index of Competence. *Arch Gerontol Geriatr* 1991;13(2):103-16.
37. Awata S, Bech P, Koizumi Y, et al. Validity and utility of the Japanese version of the WHO-Five Well-Being Index in the context of detecting suicidal ideation in elderly community residents. *Int Psychogeriatr* 2007;19(1):77-88.
38. Dupont WD, Plummer WD, Jr. Power and sample size calculations. A review and computer program. *Control Clin Trials* 1990;11(2):116-28.
39. Berton L, Bano G, Carraro S, et al. Effect of oral beta-hydroxy-beta-methylbutyrate (HMB) supplementation on physical performance in healthy old women over 65 years: an open label randomized controlled trial. *PLoS One* 2015;10(11):e0141757.

1  
2  
3  
4  
5 Figure legends

6 Figure 1. Study flowchart covering participant recruitment and enrolment, group allocation,  
7 intervention, observation, and data analysis

8  
9 A second intervention will be provided after the follow-up assessment, in agreement with ethical  
10 principles. However, only data from the highlighted fields will be included in the analysis.  
11  
12  
13  
14  
15  
16  
17  
18  
19  
20  
21  
22  
23  
24  
25  
26  
27  
28  
29  
30  
31  
32  
33  
34  
35  
36  
37  
38  
39  
40  
41  
42  
43  
44  
45  
46  
47  
48  
49  
50  
51  
52  
53  
54  
55  
56  
57  
58  
59  
60

For peer review only

1  
2  
3  
4  
5  
6  
7  
8  
9  
10  
11  
12  
13  
14  
15  
16  
17  
18  
19  
20  
21  
22  
23  
24  
25  
26  
27  
28  
29  
30  
31  
32  
33  
34  
35  
36  
37  
38  
39  
40  
41  
42  
43  
44  
45  
46  
47  
48  
49  
50  
51  
52  
53  
54  
55  
56  
57  
58  
59  
60

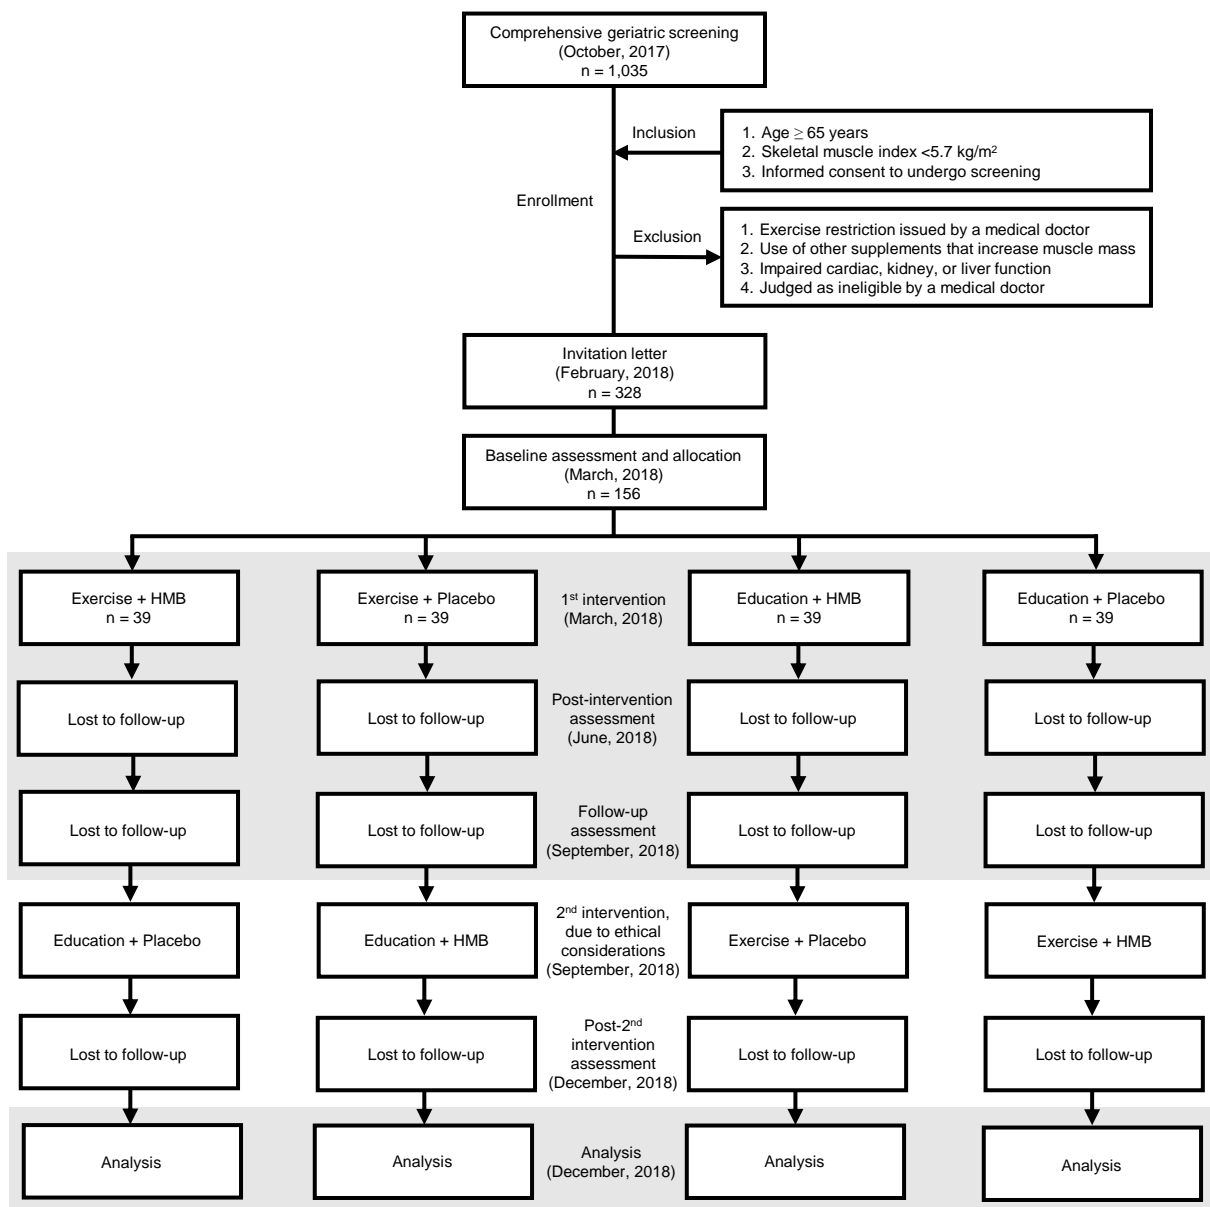

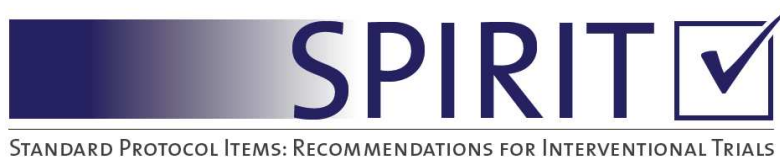

SPIRIT 2013 Checklist: Recommended items to address in a clinical trial protocol and related documents\*

| Section/item                                                        | Item No | Description                                                                                                                                                                                                                                                                                                                                                                    | Reference        |
|---------------------------------------------------------------------|---------|--------------------------------------------------------------------------------------------------------------------------------------------------------------------------------------------------------------------------------------------------------------------------------------------------------------------------------------------------------------------------------|------------------|
| <b>Administrative information</b>                                   |         |                                                                                                                                                                                                                                                                                                                                                                                |                  |
| Title                                                               | 1       | Descriptive title identifying the study design, population, interventions, and, if applicable, trial acronym                                                                                                                                                                                                                                                                   | pg. 1            |
| Trial registration                                                  | 2a      | Trial identifier and registry name. If not yet registered, name of intended registry                                                                                                                                                                                                                                                                                           | pg. 2            |
|                                                                     | 2b      | All items from the World Health Organization Trial Registration Data Set                                                                                                                                                                                                                                                                                                       | N/A              |
| Protocol version                                                    | 3       | Date and version identifier                                                                                                                                                                                                                                                                                                                                                    | N/A              |
| Funding                                                             | 4       | Sources and types of financial, material, and other support                                                                                                                                                                                                                                                                                                                    | pg. 14           |
| Roles and responsibilities                                          | 5a      | Names, affiliations, and roles of protocol contributors                                                                                                                                                                                                                                                                                                                        | pg. 1            |
|                                                                     | 5b      | Name and contact information for the trial sponsor                                                                                                                                                                                                                                                                                                                             | pg. 14           |
|                                                                     | 5c      | Role of study sponsor and funders, if any, in study design; collection, management, analysis, and interpretation of data; writing of the report; and the decision to submit the report for publication, including whether they will have ultimate authority over any of these activities                                                                                       | pg. 14           |
|                                                                     | 5d      | Composition, roles, and responsibilities of the coordinating centre, steering committee, endpoint adjudication committee, data management team, and other individuals or groups overseeing the trial, if applicable (see Item 21a for data monitoring committee)                                                                                                               | N/A              |
| <b>Introduction</b>                                                 |         |                                                                                                                                                                                                                                                                                                                                                                                |                  |
| Background and rationale                                            | 6a      | Description of research question and justification for undertaking the trial, including summary of relevant studies (published and unpublished) examining benefits and harms for each intervention                                                                                                                                                                             | pg. 3            |
|                                                                     | 6b      | Explanation for choice of comparators                                                                                                                                                                                                                                                                                                                                          | pg. 3            |
| Objectives                                                          | 7       | Specific objectives or hypotheses                                                                                                                                                                                                                                                                                                                                              | pg. 3            |
| Trial design                                                        | 8       | Description of trial design including type of trial (eg, parallel group, crossover, factorial, single group), allocation ratio, and framework (eg, superiority, equivalence, noninferiority, exploratory)                                                                                                                                                                      | pg. 3-4          |
| <b>Methods: Participants, interventions, and outcomes</b>           |         |                                                                                                                                                                                                                                                                                                                                                                                |                  |
| Study setting                                                       | 9       | Description of study settings (eg, community clinic, academic hospital) and list of countries where data will be collected. Reference to where list of study sites can be obtained                                                                                                                                                                                             | pg. 4, 5         |
| Eligibility criteria                                                | 10      | Inclusion and exclusion criteria for participants. If applicable, eligibility criteria for study centres and individuals who will perform the interventions (eg, surgeons, psychotherapists)                                                                                                                                                                                   | pg. 5, Fig. 1    |
| Interventions                                                       | 11a     | Interventions for each group with sufficient detail to allow replication, including how and when they will be administered                                                                                                                                                                                                                                                     | pg. 6, 7; Fig. 1 |
|                                                                     | 11b     | Criteria for discontinuing or modifying allocated interventions for a given trial participant (eg, drug dose change in response to harms, participant request, or improving/worsening disease)                                                                                                                                                                                 | pg. 11           |
|                                                                     | 11c     | Strategies to improve adherence to intervention protocols, and any procedures for monitoring adherence (eg, drug tablet return, laboratory tests)                                                                                                                                                                                                                              | pg. 7, 10, 11    |
|                                                                     | 11d     | Relevant concomitant care and interventions that are permitted or prohibited during the trial                                                                                                                                                                                                                                                                                  | pg. 6            |
| Outcomes                                                            | 12      | Primary, secondary, and other outcomes, including the specific measurement variable (eg, systolic blood pressure), analysis metric (eg, change from baseline, final value, time to event), method of aggregation (eg, median, proportion), and time point for each outcome. Explanation of the clinical relevance of chosen efficacy and harm outcomes is strongly recommended | pg. 11           |
| Participant timeline                                                | 13      | Time schedule of enrolment, interventions (including any run-ins and washouts), assessments, and visits for participants. A schematic diagram is highly recommended (see Figure)                                                                                                                                                                                               | pg. 5, Fig. 1    |
| Sample size                                                         | 14      | Estimated number of participants needed to achieve study objectives and how it was determined, including clinical and statistical assumptions supporting any sample size calculations                                                                                                                                                                                          | pg. 11           |
| Recruitment                                                         | 15      | Strategies for achieving adequate participant enrolment to reach target sample size                                                                                                                                                                                                                                                                                            | pg. 11           |
| <b>Methods: Assignment of interventions (for controlled trials)</b> |         |                                                                                                                                                                                                                                                                                                                                                                                |                  |

|    |                                                           |     |                                                                                                                                                                                                                                                                                                                                                                                                              |                     |
|----|-----------------------------------------------------------|-----|--------------------------------------------------------------------------------------------------------------------------------------------------------------------------------------------------------------------------------------------------------------------------------------------------------------------------------------------------------------------------------------------------------------|---------------------|
| 1  | Allocation:                                               |     |                                                                                                                                                                                                                                                                                                                                                                                                              |                     |
| 2  | Sequence generation                                       | 16a | Method of generating the allocation sequence (eg, computer-generated random numbers), and list of any factors for stratification. To reduce predictability of a random sequence, details of any planned restriction (eg, blocking) should be provided in a separate document that is unavailable to those who enrol participants or assign interventions                                                     | pg. 6               |
| 3  | Allocation concealment mechanism                          | 16b | Mechanism of implementing the allocation sequence (eg, central telephone; sequentially numbered, opaque, sealed envelopes), describing any steps to conceal the sequence until interventions are assigned                                                                                                                                                                                                    | pg. 6, 7            |
| 4  | Implementation                                            | 16c | Who will generate the allocation sequence, who will enrol participants, and who will assign participants to interventions                                                                                                                                                                                                                                                                                    | pg. 6, 7            |
| 5  | Blinding (masking)                                        | 17a | Who will be blinded after assignment to interventions (eg, trial participants, care providers, outcome assessors, data analysts), and how                                                                                                                                                                                                                                                                    | pg. 6, 7            |
| 6  |                                                           | 17b | If blinded, circumstances under which unblinding is permissible, and procedure for revealing a participant's allocated intervention during the trial                                                                                                                                                                                                                                                         | pg. 6               |
| 7  | <b>Methods: Data collection, management, and analysis</b> |     |                                                                                                                                                                                                                                                                                                                                                                                                              |                     |
| 8  | Data collection methods                                   | 18a | Plans for assessment and collection of outcome, baseline, and other trial data, including any related processes to promote data quality (eg, duplicate measurements, training of assessors) and a description of study instruments (eg, questionnaires, laboratory tests) along with their reliability and validity, if known. Reference to where data collection forms can be found, if not in the protocol | pg. 7-11            |
| 9  |                                                           | 18b | Plans to promote participant retention and complete follow-up, including list of any outcome data to be collected for participants who discontinue or deviate from intervention protocols                                                                                                                                                                                                                    | pg. 7, 10, 11       |
| 10 | Data management                                           | 19  | Plans for data entry, coding, security, and storage, including any related processes to promote data quality (eg, double data entry; range checks for data values). Reference to where details of data management procedures can be found, if not in the protocol                                                                                                                                            | pg. 11              |
| 11 | Statistical methods                                       | 20a | Statistical methods for analysing primary and secondary outcomes. Reference to where other details of the statistical analysis plan can be found, if not in the protocol                                                                                                                                                                                                                                     | pg. 11              |
| 12 |                                                           | 20b | Methods for any additional analyses (eg, subgroup and adjusted analyses)                                                                                                                                                                                                                                                                                                                                     | pg. 11-12           |
| 13 |                                                           | 20c | Definition of analysis population relating to protocol non-adherence (eg, as randomised analysis), and any statistical methods to handle missing data (eg, multiple imputation)                                                                                                                                                                                                                              | pg. 12              |
| 14 | <b>Methods: Monitoring</b>                                |     |                                                                                                                                                                                                                                                                                                                                                                                                              |                     |
| 15 | Data monitoring                                           | 21a | Composition of data monitoring committee (DMC); summary of its role and reporting structure; statement of whether it is independent from the sponsor and competing interests; and reference to where further details about its charter can be found, if not in the protocol. Alternatively, an explanation of why a DMC is not needed                                                                        | N/A                 |
| 16 |                                                           | 21b | Description of any interim analyses and stopping guidelines, including who will have access to these interim results and make the final decision to terminate the trial                                                                                                                                                                                                                                      | N/A                 |
| 17 | Harms                                                     | 22  | Plans for collecting, assessing, reporting, and managing solicited and spontaneously reported adverse events and other unintended effects of trial interventions or trial conduct                                                                                                                                                                                                                            | pg. 11              |
| 18 | Auditing                                                  | 23  | Frequency and procedures for auditing trial conduct, if any, and whether the process will be independent from investigators and the sponsor                                                                                                                                                                                                                                                                  | N/A                 |
| 19 | <b>Ethics and dissemination</b>                           |     |                                                                                                                                                                                                                                                                                                                                                                                                              |                     |
| 20 | Research ethics approval                                  | 24  | Plans for seeking research ethics committee/institutional review board (REC/IRB) approval                                                                                                                                                                                                                                                                                                                    | Approved; pg. 5, 12 |
| 21 | Protocol amendments                                       | 25  | Plans for communicating important protocol modifications (eg, changes to eligibility criteria, outcomes, analyses) to relevant parties (eg, investigators, REC/IRBs, trial participants, trial registries, journals, regulators)                                                                                                                                                                             | pg. 5               |
| 22 | Consent or assent                                         | 26a | Who will obtain informed consent or assent from potential trial participants or authorised surrogates, and how (see Item 32)                                                                                                                                                                                                                                                                                 | pg. 14              |
| 23 |                                                           | 26b | Additional consent provisions for collection and use of participant data and biological specimens in ancillary studies, if applicable                                                                                                                                                                                                                                                                        | N/A                 |
| 24 | Confidentiality                                           | 27  | How personal information about potential and enrolled participants will be collected, shared, and maintained in order to protect confidentiality before, during, and after the trial                                                                                                                                                                                                                         | pg. 5               |
| 25 | Declaration of interests                                  | 28  | Financial and other competing interests for principal investigators for the overall trial and each study site                                                                                                                                                                                                                                                                                                | pg. 14              |
| 26 | Access to data                                            | 29  | Statement of who will have access to the final trial dataset, and disclosure of contractual agreements that limit such access for investigators                                                                                                                                                                                                                                                              | pg. 14              |
| 27 | Ancillary and post-trial care                             | 30  | Provisions, if any, for ancillary and post-trial care, and for compensation to those who suffer harm from trial participation                                                                                                                                                                                                                                                                                | pg. 11              |

|                                                                                                                                                                                                                                                                                                    |                            |     |                                                                                                                                                                                                                                                                                     |        |
|----------------------------------------------------------------------------------------------------------------------------------------------------------------------------------------------------------------------------------------------------------------------------------------------------|----------------------------|-----|-------------------------------------------------------------------------------------------------------------------------------------------------------------------------------------------------------------------------------------------------------------------------------------|--------|
| 1<br>2<br>3<br>4<br>5<br>6                                                                                                                                                                                                                                                                         | Dissemination policy       | 31a | Plans for investigators and sponsor to communicate trial results to participants, healthcare professionals, the public, and other relevant groups (eg, via publication, reporting in results databases, or other data sharing arrangements), including any publication restrictions | pg. 14 |
| 7                                                                                                                                                                                                                                                                                                  |                            | 31b | Authorship eligibility guidelines and any intended use of professional writers                                                                                                                                                                                                      | pg. 14 |
| 8                                                                                                                                                                                                                                                                                                  |                            | 31c | Plans, if any, for granting public access to the full protocol, participant-level dataset, and statistical code                                                                                                                                                                     | N/A    |
| 9                                                                                                                                                                                                                                                                                                  | <b>Appendices</b>          |     |                                                                                                                                                                                                                                                                                     |        |
| 10<br>11                                                                                                                                                                                                                                                                                           | Informed consent materials | 32  | Model consent form and other related documentation given to participants and authorised surrogates                                                                                                                                                                                  | pg. 5  |
| 12<br>13<br>14<br>15<br>16<br>17<br>18<br>19<br>20<br>21<br>22<br>23<br>24<br>25<br>26<br>27<br>28<br>29<br>30<br>31<br>32<br>33<br>34<br>35<br>36<br>37<br>38<br>39<br>40<br>41<br>42<br>43<br>44<br>45<br>46<br>47<br>48<br>49<br>50<br>51<br>52<br>53<br>54<br>55<br>56<br>57<br>58<br>59<br>60 | Biological specimens       | 33  | Plans for collection, laboratory evaluation, and storage of biological specimens for genetic or molecular analysis in the current trial and for future use in ancillary studies, if applicable                                                                                      | N/A    |

\*It is strongly recommended that this checklist be read in conjunction with the SPIRIT 2013 Explanation & Elaboration for important clarification on the items. Amendments to the protocol should be tracked and dated. The SPIRIT checklist is copyrighted by the SPIRIT Group under the Creative Commons "[Attribution-NonCommercial-NoDerivs 3.0 Unported](https://creativecommons.org/licenses/by-nc-nd/3.0/)" license.



# BMJ Open

## Effects of resistance training and/or beta-hydroxy-beta-methylbutyrate supplementation on muscle mass, muscle strength, and physical performance in older women with reduced muscle mass: protocol for a randomized, double-blind, placebo-controlled trial

|                                 |                                                                                                                                                                                                                                                                                                                                                                                                                                                                                                                                                                      |
|---------------------------------|----------------------------------------------------------------------------------------------------------------------------------------------------------------------------------------------------------------------------------------------------------------------------------------------------------------------------------------------------------------------------------------------------------------------------------------------------------------------------------------------------------------------------------------------------------------------|
| Journal:                        | <i>BMJ Open</i>                                                                                                                                                                                                                                                                                                                                                                                                                                                                                                                                                      |
| Manuscript ID                   | bmjopen-2018-025723.R1                                                                                                                                                                                                                                                                                                                                                                                                                                                                                                                                               |
| Article Type:                   | Protocol                                                                                                                                                                                                                                                                                                                                                                                                                                                                                                                                                             |
| Date Submitted by the Author:   | 07-Dec-2018                                                                                                                                                                                                                                                                                                                                                                                                                                                                                                                                                          |
| Complete List of Authors:       | Osuka, Yosuke; Tokyo Metropolitan Institute of Gerontology, Research Team for Promoting Independence of the Elderly<br>Kojima, Narumi; Tokyo Metropolitan Institute of Gerontology, Research Team for Promoting Independence of the Elderly<br>Wakaba, Kyohsuke; University of Tsukuba, Faculty of Health and Sport Sciences<br>Miyachi, Daiji; Kyowa Co., Ltd<br>Tanaka, Kiyoji; University of Tsukuba, Faculty of Health and Sport Sciences<br>Kim, Hunkyung; Tokyo Metropolitan Institute of Gerontology, Research Team for Promoting Independence of the Elderly |
| <b>Primary Subject Heading</b>: | Nutrition and metabolism                                                                                                                                                                                                                                                                                                                                                                                                                                                                                                                                             |
| Secondary Subject Heading:      | Sports and exercise medicine                                                                                                                                                                                                                                                                                                                                                                                                                                                                                                                                         |
| Keywords:                       | sarcopenia, exercise and nutrition, muscle mass and strength, physical performance, RCT                                                                                                                                                                                                                                                                                                                                                                                                                                                                              |
|                                 |                                                                                                                                                                                                                                                                                                                                                                                                                                                                                                                                                                      |

SCHOLARONE™  
Manuscripts

1  
2  
3  
4  
5  
6 **Effects of resistance training and/or beta-hydroxy-beta-methylbutyrate supplementation on**  
7 **muscle mass, muscle strength, and physical performance in older women with reduced muscle**  
8 **mass: protocol for a randomized, double-blind, placebo-controlled trial**  
9

10  
11 Yosuke Osuka<sup>1</sup>, Narumi Kojima<sup>1</sup>, Kyohsuke Wakaba<sup>2</sup>, Daiji Miyauchi<sup>3</sup>, Kiyoji Tanaka<sup>2</sup>, and  
12 Hunkyung Kim<sup>1</sup>  
13

14 <sup>1</sup>Research Team for Promoting Independence of the Elderly, Tokyo Metropolitan Institute of  
15 Gerontology, Tokyo, Japan  
16

17 <sup>2</sup>Faculty of Health and Sport Sciences, University of Tsukuba, Ibaraki, Japan  
18

19 <sup>3</sup>Kyowa Co., Ltd., Tokyo, Japan.  
20  
21

22 **Corresponding author**

23 Yosuke Osuka, PhD

24 Research Team for Promoting Independence of the Elderly

25 Tokyo Metropolitan Institute of Gerontology

26 35-2, Sakae-cho, Itabshi-ku, Tokyo, 173-0015, Japan  
27

28 E-mail: osuka@tmig.or.jp

29 Phone: +81-3-3964-3241  
30  
31  
32  
33

34 **Word count:** 4000/4000 words  
35  
36  
37  
38  
39  
40  
41  
42  
43  
44  
45  
46  
47  
48  
49  
50  
51  
52  
53  
54  
55  
56  
57  
58  
59  
60

## ABSTRACT

### Introduction

Resistance training (RT) and nutritional supplementation seem to have beneficial effects on muscle properties and physical performance in older adults. However, the reported effects of specific RT programs and supplementation prescriptions vary among studies. The present study aims to examine the acute and residual effects of RT and/or beta-hydroxy-beta-methylbutyrate (HMB) supplementation on muscle mass, muscle strength, and physical performance in older women with reduced muscle mass.

### Methods and analysis

This is a randomized, double-blind, placebo-controlled trial. Older women fitting the eligibility criteria were recruited in February 2018 from a population-based sample identified via a screening conducted in October 2017. In March 2018, the 156 participants were randomly allocated to undergo one of four interventions (RT+HMB, RT+placebo, education+HMB, and education+placebo) for 12 weeks. Supervised RT consisted of body weight, elastic band, ankle weight, and machine-based exercises twice weekly at the Tokyo Metropolitan Institute of Gerontology. Each participant ingested HMB (1,200 mg) or placebo supplements once daily. Sessions of education not associated with sarcopenia treatment were conducted every two weeks. Post-intervention follow-up will be conducted for 12 weeks, until September 2018. The study includes assessments conducted in March (baseline), June (post-intervention), and September 2018 (follow-up). The primary outcome is the longitudinal change in muscle mass. Secondary outcomes include the longitudinal changes in muscle strength, physical performance, muscle thickness, muscle quality, blood counts, blood biochemistry, calf circumference, skin viscoelasticity, habitual dietary intake, habitual physical activity levels, functional capacity, and health-related quality of life. Intention-to-treat analyses will be conducted.

### Ethics and dissemination

The study protocol was approved by the Ethics Committee of the Tokyo Metropolitan Institute of Gerontology, Japan. The study is being conducted according to the principles of the Declaration of Helsinki. The findings will be presented at international academic congresses and published in peer-reviewed international journals.

### Trial registration

URL: [https://upload.umin.ac.jp/cgi-open-bin/ctr\\_e/ctr\\_view.cgi?recptno=R000032688](https://upload.umin.ac.jp/cgi-open-bin/ctr_e/ctr_view.cgi?recptno=R000032688)

**STRENGTHS AND LIMITATIONS OF THIS STUDY**

- To the best of our knowledge, this will be the first four-arm trial to examine the effects of resistance training and/or HMB supplementation among older adults with reduced muscle mass.
- The study will collect information about the residual effects of the intervention over an observation period of 12 weeks.
- The trial has a randomized, double-blind, placebo-controlled design, which supports the generalizability of the findings and minimizes the risk of selection, performance, and detection bias.
- In addition to machine-based exercises, the participants will also perform resistance training using body weight, ankle weights, and elastic bands, which will not provide objective information regarding muscle loading but which represents a more suitable prescription for older adults and a more feasible exercise routine to be performed on a daily basis.
- All participants will be older women, which limits generalization of the findings to men.

## INTRODUCTION

Sarcopenia is a syndrome characterised by progressive and generalized loss of skeletal muscle mass and strength.<sup>[1]</sup> In older adults, sarcopenia is associated with adverse health outcomes such as increased risk of incident falls,<sup>[2]</sup> reduced performance in instrumental or basic activities of daily living, hospitalization, institutionalization, and mortality.<sup>[3-4]</sup> To reduce the social burden of sarcopenia, it is important to develop prevention and treatment programs aimed to extend healthy life expectancy especially in older people with high risk of sarcopenia.

Most sarcopenia prevention or treatment programs recommend a combination of resistance training (RT) and nutritional supplementation.<sup>[5-7]</sup> According to a meta-analysis of nine randomized control trials (RCTs) on the combined effect of protein supplementation and RT on muscle outcomes, such strategies may be effective for increasing fat-free mass among older adults.<sup>[8]</sup> Both the European Working Group on Sarcopenia in Older People and the International Working Group on Sarcopenia, which serve as international advisory committees on sarcopenia, have argued in favour of leucine and beta-hydroxy-beta-methylbutyrate (HMB) supplementation as complementary strategies for sarcopenia prevention or treatment.<sup>[9]</sup>

HMB is synthesized in skeletal muscle via transamination of leucine to alpha-ketoisocaproic acid (KIC) by aminotransferase.<sup>[10]</sup> It is estimated that only 5–10% of KIC is metabolized by KIC dioxygenase to produce HMB in the liver.<sup>[11]</sup> HMB supplementation is believed to exert beneficial effects on skeletal muscle by increasing protein synthesis through activation of the mammalian target of rapamycin and by decreasing protein catabolism through down-regulation of the ubiquitin proteasome pathway.<sup>[12]</sup> However, there are few studies on the combined effects of RT and HMB supplementation on muscle outcomes in older adults.<sup>[13]</sup> To our knowledge, two RCTs have examined such effects in elderly populations, but the participants were healthy older adults and the RCTs had a two-arm design.<sup>[14-15]</sup> Additionally, the residual effects of RT and/or HMB supplementation on muscle outcomes remain unclear. Thus, it is necessary to investigate the combined effect of RT and HMB supplementation in older populations with muscle wasting, and such studies should be designed as four-arm RCTs (RT-only, HMB supplementation-only, both, and none).<sup>[9]</sup>

The present study aims to examine the acute and residual effects of RT and/or HMB supplementation on muscle mass, muscle strength, and physical performance in older women with reduced muscle mass. We hypothesized that, compared to RT alone, HMB supplementation alone, and placebo, combined RT and HMB supplementation would provide higher benefit in terms of improving and maintaining muscle mass, muscle strength, and physical performance. These findings will provide new evidence regarding the effectiveness of non-pharmaceutical interventions for sarcopenia, and will be useful in the development of sarcopenia prevention and treatment programs in physically frail populations.

## METHODS AND ANALYSIS

### Study design, procedure, and ethics

In accordance with the SPIRIT (Standard Protocol Items: Recommendations for Interventional Trials) and CONSORT (Consolidated Standards of Reporting Trials) statements, we designed a randomized, double-blind, placebo-controlled trial to be conducted between March and September 2018 at the Tokyo Metropolitan Institute of Gerontology (TMIG), Tokyo, Japan. The study protocol was registered with the University Hospital Medical Information Network Clinical Trials Registry (UMIN-CTR) on 7 August 2017 (trial registration no. UMIN000028560) and was approved by the Ethics Committee of the TMIG on 15 September 2017.

Older women fitting the eligibility criteria were recruited in February 2018, from among a population-based sample identified via a screening conducted in October 2017. After recruitment, a four-arm intervention was conducted between March and June 2018. The participants will be followed until September 2018 to observe the residual effects of the intervention. After the observation period, all interventions will be available to all participants, in agreement with ethical principles. Amendments to the protocol will be disclosed on the UMIN-CTR page of the trial. The study involves assessments conducted in March (baseline), June (post-intervention), and September 2018 (follow-up). Before the baseline assessment, all participants have received written and oral information from the researchers (YO, NK, and KH) regarding the study purpose, procedures, confidentiality of personal information, possible benefits, possible risks, and coping strategy for the risks. Only participants who provided written informed consent proceeded within the trial. The flow chart of the study is shown in Figure 1.

### Participants

To select the study sample, a population-based comprehensive geriatric survey was conducted as screening assessment at the TMIG in October 2017. Invitation letters for the screening assessment were sent to 6,366 subjects randomly selected from the Basic Resident Register of the Itabashi ward, which is a special ward located in the northwest area of Tokyo. In total, 1,035 older women participated in the screening assessment. The inclusion criteria of this study were: (i) age  $\geq 65$  years; (ii) reduced muscle mass, defined as a skeletal muscle index  $< 5.7$  kg/m<sup>2</sup>, per the sarcopenia diagnosis consensus issued by the Asian Working Group for Sarcopenia<sup>[16]</sup>; and (iii) informed consent for undergoing screening. The exclusion criteria were: (i) exercise restriction issued by a medical doctor; (ii) use of other supplements known to increase muscle mass; (iii) impaired cardiac, kidney, or liver function; and (iv) judged as ineligible by a medical doctor. A sample of 328 women fitting the eligibility criteria received invitation letters regarding the study intervention, of whom 156 participated in the baseline assessment, whereas the remaining 172 declined to participate due to personal reasons.

### Randomization, allocation concealment, and blinding

A baseline assessment was conducted in March 2018. Afterwards, the participants were randomly

1  
2  
3  
4  
5  
6 allocated to four groups in a ratio of 1:1:1:1 based on a computer-generated randomization number.  
7 The allocation was conducted by two researchers from the University of Tsukuba (KW and KT). The  
8 allocation keys will be blinded from the researchers at the TMIG (YO, NK, and HK), participants,  
9 exercise trainer, analysts, and assessors until December 2018 in order to maintain allocation  
10 concealment. The researchers holding the allocation keys will not have contact with the participants.  
11  
12  
13

### 14 **Intervention**

15  
16 During the intervention and observational periods, all participants were instructed not to change their  
17 habitual dietary intake or physical activity levels.  
18  
19

#### 20 **RT program**

21  
22 Participants allocated to the RT program took part in 60-min exercise sessions on two non-consecutive  
23 days per week for 12 weeks. All sessions took place at the TMIG, under the supervision of a well-  
24 experienced exercise trainer who was not one of the researchers associated with the study. Each  
25 exercise session consisted of a 5-min warm-up exercise, a 50-min RT exercise, and a 5-min cool-down  
26 exercise. Warm-up and cool-down exercises included stretching activities for the shoulders, trunk,  
27 chest, hips, and hamstrings. RT consisted of chair-based (weeks 1–12), elastic band (weeks 5–7), ankle  
28 weight (weeks 7–12), and machine-based exercises (weeks 9–12). The chair-based exercise included  
29 heel raise, toe raise, knee extension, hip adduction using a rubber ball, and knee lift exercises from the  
30 sitting position, as well as squats. Additionally, heel raise and knee lift exercises were performed  
31 progressively from a seated to a standing position, and lateral leg raise exercises were performed while  
32 standing behind the chair and holding onto the back of the chair. Elastic band exercises included knee  
33 lift, hip adduction, and arm rowing exercises. Knee extension exercises in sitting position, as well as  
34 heel raise, knee lift, and lateral leg raise exercises in standing position also were performed using ankle  
35 weights of 0.5, 0.75, 1.0, or 1.5 kg, according to the physical condition of each participant. In the last  
36 4 weeks of the intervention, the participants performed five types of exercise (arm rowing, leg  
37 extension, hip lateral rotation, leg press, and trunk flexion) using dedicated RT machines (Mizuno  
38 Ltd., Tokyo, Japan). All exercises were performed as 1–3 sets of 8–10 repetitions with gradual loading.  
39 The number of sets and repetitions was increased based on the perceived exertion of each participant.  
40 Each movement was performed slowly, in 8 counts (increasing strength in the first 4 counts and  
41 decreasing strength in the last 4 counts). The exercise trainer supervised the participants and provided  
42 verbal feedback to ensure sufficient tension was achieved in the target muscle groups. Exercise  
43 intensity was maintained at 12–14 points on the Borg Rate of Perceived Exertion scale. This RT  
44 program was based on a program employed successfully in our previous studies.<sup>[17-19]</sup>  
45  
46  
47  
48  
49  
50  
51  
52  
53  
54  
55  
56

#### 57 **HMB and placebo supplementation**

1  
2  
3  
4  
5  
6 All participants were instructed to ingest active (calcium HMB) or placebo products provided by  
7 Kyowa Co., Ltd., Tokyo, Japan. The active products contain 30 mg of protein, 20 mg of fat, 3,500 mg  
8 of carbohydrates, 0.2 mg of sodium, 207 mg of calcium, and 1,200 mg of HMB. Placebo products do  
9 not include calcium or HMB, and the missing amounts are provided as carbohydrates. Both products  
10 are provided in powder form with the same flavour, appearance, and packaging. The two researchers  
11 (KW and KT) maintaining the allocation keys labelled the package with an identification code and  
12 sent the products to the researchers at the TMIG (YO, NK, and HK). The participants received the  
13 blinded product, which they were instructed to mix with 200 mL of water and ingest once a day after  
14 any meal. The participants were instructed to record the ingestion of products in a diary.

15  
16 While there are no clear recommendations regarding HMB supplementation, Wu et al. suggested a  
17 daily dose of 3,000 mg for older adults.<sup>[20]</sup> However, as body weight is lower among sarcopenic  
18 Japanese older women than among western older women,<sup>[17 21 22]</sup> we set the active dose at 1,200 mg  
19 HMB daily based on the positive results we previously obtained in a similar population,<sup>[17]</sup> which used  
20 a daily HMB dosage similar to that used in other studies (0.03 vs. 0.03–0.04 g/kg of body weight).<sup>[21</sup>  
21  
22  
23  
24  
25  
26  
27  
28  
29  
30  
31  
32  
33  
34  
35  
36  
37  
38  
39  
40  
41  
42  
43  
44  
45  
46  
47  
48  
49  
50  
51  
52  
53  
54  
55  
56  
57  
58  
59  
60

<sup>22]</sup> No adverse events associated with HMB supplementation have been reported.<sup>[23]</sup>

#### Health education program

Participants allocated to the health education groups took part in six 60-min sessions (once every two weeks for 12 weeks) of health education not related to sarcopenia prevention but focused specifically on dementia prevention, prevention of bank transfer fraud, music therapy, nutrition and general health, oral care, and social education, each given at the TMIG by an expert in that field.

#### Assessments

This study includes assessments conducted in March (baseline), June (post-intervention), and September 2018 (follow-up) at the TMIG. All assessors are TMIG employees who are not researchers and are blinded to group allocation.

#### Body composition

Body composition assessments involve measuring the following muscle mass indices: whole-body fat-free mass; upper-extremity and lower-extremity lean mass; appendicular lean mass, as the sum of the upper- and lower-extremity lean mass; and skeletal mass index, as the appendicular lean mass divided by the height squared (kg/m<sup>2</sup>).<sup>[24]</sup> The body weight, fat mass, and percent fat are also obtained. Body composition measurements are conducted using the InBody720 device (Biospace Co., Ltd, Seoul, Korea), which was validated against dual-energy X-ray absorptiometry systems for estimating appendicular lean mass in community-dwelling older populations,<sup>[25]</sup> providing minimal within-day coefficients of variation for all six frequencies (0–1.9%).<sup>[26]</sup>



## Muscle strength

### *Knee extensor strength*

Peak isometric knee extensor strength in the dominant leg is measured in a sitting position. The assessor places the hand-held dynamometer ( $\mu$ Tas F-1; ANIMA, Tokyo, Japan) on the skin above the anterior ankle, at a level 5 cm above the tip of the lateral malleolus. The participants are instructed to extend the knee with maximum power starting from a knee joint angle of 90°.<sup>[27]</sup> After a few practice repetitions, the participants are measured twice, and the best result is retained.

### *Hip adductor strength*

Peak isometric hip adduction strength is also measured in a sitting position. The assessor places the hand-held dynamometer ( $\mu$ Tas F-1; ANIMA) at 3 cm proximal to the medial knee fissure and instructs the participant to exert maximal hip adduction force while compressing a 12-cm rod equipped with a dynamometer, keeping both knee joints at 90°.<sup>[28]</sup> After a few practice repetitions, the participants are measured twice, and the best result is retained.

### *Handgrip strength*

Handgrip strength is measured using a hand-held Smedley-type dynamometer. The participants are instructed to stand naturally, grip the device with their dominant hand, and squeeze as hard as possible.<sup>[29]</sup> The best result of two trials is retained.

## Physical performance

### *Usual and maximal gait speed*

Using a stopwatch, the usual and maximal gait speed are measured as the time taken to walk 5 m (between markers set at 3 m and 8 m of an 11-m walking path)<sup>[29]</sup> at the usual or maximal speed, respectively. Usual gait speed is measured once. Maximal gait speed is measured twice, and the best result is retained.

### *Timed up-and-go*

This test measures the time taken to stand up from the chair, walk to and around a marker placed 3 m away, return to the chair, and sit back down.<sup>[30]</sup> The participants are instructed to perform these movements as quickly as possible. The test is performed twice, and the best result is retained.

### *Five-repetition sit-to-stand*

This test measures the time taken to stand up from the chair until full knee and hip extension, sit back down, and repeat this movement five times as quickly as possible.<sup>[31]</sup> The participants are instructed to fold their arms across the chest, stand-up completely, and make firm contact when sitting. After a few practice repetitions, the test is performed twice, and the best result is retained.

## Muscle thickness and quality

1  
2  
3  
4  
5  
6 Muscle thickness is measured using a B-mode ultrasound device (Mysono U6; Samsung Medison,  
7 Seoul, Korea). The participants are instructed to lie on the back in a bed and extend the hip and knee  
8 until fully relaxed. The assessor performs a transverse scan by placing a linear probe (5–12 MHz) on  
9 the skin surface at the midpoint between the lateral epicondyle and the ipsilateral greater trochanter of  
10 the femur, perpendicular to the longitudinal axis of the quadriceps femoris muscle. To measure the  
11 thickness of the rectus femoris and vastus intermedius, an electronic calliper is used. Quadriceps  
12 femoris thickness is defined as the sum of the thickness of the rectus femoris and that of the vastus  
13 intermedius. The muscle quality of the rectus femoris is evaluated on ultrasound images processed  
14 using dedicated software (Adobe Photoshop CS6 version 13.0; Adobe Systems, San Jose, CA, USA)  
15 and is expressed as the brightness of the image on a scale from 0 (black) to 256 (white). Muscle echo  
16 intensity was shown to correlate significantly with interstitial fibrous tissue in muscle biopsy  
17 samples.<sup>[32]</sup> The protocol for assessing muscle thickness and quality is described in detail elsewhere.<sup>[33]</sup>  
18  
19  
20  
21  
22  
23  
24

#### 25 Blood biochemistry

26 Blood samples are collected from the antecubital vein. Analyses are carried out centrally in one  
27 laboratory (Health Sciences Research Institute, Inc., Kanagawa, Japan). Enzymatic methods are used  
28 to determine creatinine, cholesterol (total, high-density lipoprotein, low-density lipoprotein),  
29 triglyceride, blood glucose, and glycated haemoglobin levels. Reference methods recommended by  
30 the Japan Society of Clinical Chemistry are used to assess aspartate transaminase, alanine  
31 transaminase, lactate dehydrogenase, and creatinine kinase levels. Other assays include the urease  
32 method with glutamate dehydrogenase (for blood urea nitrogen), direct colorimetry (for Fe), flow  
33 cytometry (for white blood cells), erythrocyte fragility test (for red blood cells), sodium lauryl sulphate  
34 method (for haemoglobin), microhematocrit method (for haematocrit), latex agglutination  
35 turbidimetry (for cystatin C), nephelometric immunoassay (for high-sensitivity C-reactive protein),  
36 immunoradiometric assay (for insulin-like growth factor-1), and chemiluminescence immunoassay  
37 (for vitamin B12).  
38  
39  
40  
41  
42  
43  
44  
45

#### 46 Anthropometric indices

47 The body mass index (kg/m<sup>2</sup>) is calculated as the body weight divided by the body height squared.  
48 Plastic tape is used to measure the calf circumference in the non-dominant leg.  
49  
50  
51

#### 52 Skin viscoelasticity

53 Skin viscoelasticity is evaluated using the Cutometer® dual MPA 580 (Courage + Khazaka electronic  
54 GmbH, Cologne, Germany), which measures the elasticity of the upper layer of the skin using negative  
55 pressure to induce mechanical deformation; such measurements are useful for quantitative evaluation  
56 of age-related changes in skin elasticity.<sup>[34 35]</sup> The displacement of the skin at the aperture of the  
57  
58  
59  
60

1  
2  
3  
4  
5  
6 Cutometer® probe is measured optically, and the resistance of the upper skin layer to the applied  
7 negative pressure and the ability to return to the original position are displayed as curves in real time.  
8 Skin viscoelasticity is assessed for the skin of the cheek. The participants are instructed to refrain from  
9 using makeup on the day of the assessment. The test is performed five times with 10-sec intervals, and  
10 the average result is retained.  
11  
12

#### 13 14 15 Habitual dietary intake and physical activity

16 Habitual dietary intake is measured using a brief-type self-administered diet history questionnaire,  
17 which has been validated for estimating the monthly energy intake and the intake of each nutrient  
18 factor in older adults.<sup>[36 37]</sup> These calculations are performed exclusively using software provided by  
19 Gender Medical Research Co., Ltd., Tokyo, Japan. Habitual physical activity levels are assessed using  
20 the International Physical Activity Questionnaire, which has good reliability and validity for  
21 estimating daily physical activity levels.<sup>[38 39]</sup> We calculate total scores and the scores for each of the  
22 four physical activity domains (leisure time, domestic and gardening, occupational, and transport-  
23 related physical activity). These evaluations are conducted to determine whether the participants  
24 changed their lifestyle patterns during the intervention period.  
25  
26  
27  
28  
29

#### 30 31 Functional capacity

32 Functional capacity is assessed in terms of the instrumental self-maintenance (five items), intellectual  
33 activities (four items), and social roles (four items) subscales of the TMIG index of competence. The  
34 validity and reliability of the face-to-face assessment of the TMIG index of competence have been  
35 demonstrated previously.<sup>[40]</sup> Participants are asked whether or not they are able to perform the function  
36 described by each item, to which they may answer either “yes” (able to do so, 1 point) or “no” (unable  
37 to do so, 0 points), for a maximum total score of 13 points, with a higher score indicating better  
38 functional capacity.  
39  
40  
41  
42  
43

#### 44 45 Health-related quality of life (HR-QoL)

46 HR-QoL is assessed using the World Health Organization-Five Well-Being Index, which has good  
47 validity for assessing mental condition in older adults, and consists of five items representing mood in  
48 daily life over the preceding two weeks.<sup>[41]</sup> The participants are instructed to rate the frequency of the  
49 mood from 0 (never) to 5 (all the time), for a maximum score of 25 points, with a higher score  
50 indicating better mental condition.  
51  
52  
53  
54

#### 55 56 **Assessment of adverse events and adherence**

57 Any RT- or supplement-related adverse events occurring during the intervention period are recorded.  
58 The affected participants are free to discontinue the trial or continue other interventions (i.e.,  
59  
60

1  
2  
3  
4  
5  
6 participants with HMB- or placebo-related side effects may continue to perform RT, whereas  
7 participants with RT-related injuries may continue to take HMB or placebo). We assess the adherence  
8 to the intervention, including RT participation rate and adherence to the daily use of the assigned  
9 supplement (based on the participants' daily diary of study product intake). If a participant drops out  
10 from the program, the reasons are recorded.  
11  
12

### 13 14 15 **Outcome measures**

16 The primary outcome measure is muscle mass. Secondary outcome measures include muscle strength,  
17 physical performance, muscle thickness, muscle quality, blood counts, blood biochemistry, calf  
18 circumference, skin viscoelasticity, habitual dietary intake, habitual physical activity levels, functional  
19 capacity, and HR-QoL.  
20  
21

### 22 23 24 **Sample size**

25 This study is designed to detect a moderate effect size ( $f = 0.25$ ) for significant interactions between  
26 two factors (RT vs education and HMB vs placebo) regarding the longitudinal changes in outcomes.  
27 Detecting significant interactions would confirm our hypothesis that, compared to RT alone, HMB  
28 supplementation alone, and placebo, combined RT and HMB supplementation provides higher benefit  
29 in muscle mass, muscle strength, and physical performance. Setting the two-sided  $\alpha$ -error to 0.05 and  
30 power to 80%, the minimum sample size required was 31 participants per group. Considering  
31 approximately 20% attrition, we aimed to enrol at most 160 participants. The power calculation was  
32 conducted using G\*Power version 3.1.9.2 for Windows (Heinrich-Heine-Universität Düsseldorf,  
33 Düsseldorf, Germany).<sup>[42]</sup>  
34  
35  
36  
37  
38  
39

### 40 41 42 **Statistical analysis**

43 To promote the collection of quality data, the collected data will be double-checked by the assessors,  
44 and a statistician will check the range of values. Between-group comparisons of baseline  
45 characteristics will be conducted using one-way analysis of variance (ANOVA) or the Kruskal-Wallis  
46 test for continuous variables, and the chi-square test for categorical variables. Continuous data will be  
47 expressed as mean and standard deviation or median and interquartile range. Differences in  
48 longitudinal mean changes in main and secondary outcomes from baseline to post-intervention will  
49 form the primary focus of the analysis. Two-way ANOVA for the changes in outcomes will be applied  
50 to test for interactions between two factors (RT vs education and HMB vs placebo). The main effects  
51 of RT (RT+HMB and RT+placebo vs education+HMB and education+placebo) and HMB (RT+HMB  
52 and education+HMB vs RT+placebo and education+placebo) will also be tested. Within-group  
53 changes will be analysed using paired t-tests, while between-group differences in the change in  
54 outcomes will be compared using one-way ANOVA. The Scheffe method will be applied for  
55  
56  
57  
58  
59  
60

relationships showing significance on one-way ANOVA. The results will be presented as means and deviations. For subgroup analysis, the participants will be stratified according to sarcopenia status, as defined based on the Asian Working Group for Sarcopenia criteria. The intention-to-treat principle will be applied in all analyses. Missing data will be treated via multiple imputation, in which the Markov Chain Monte Carlo approach will be applied to generate 20 imputed data sets based on the baseline characteristics and the outcome variables. All statistical analyses will be performed using SPSS version 25.0 (IBM Corp., Armonk, NY, USA). *P*-values < 0.05 will be considered to indicate significance.

### **Patient and public involvement**

This study will be done without participant involvement. Participants will be not invited to comment on the study design and will be not consulted to develop participant relevant outcomes or interpret the results. Participants will be not invited to contribute to the writing or editing of this paper for readability or accuracy.

### **ETHICS AND DISSEMINATION**

The study protocol was approved by the Ethics Committee of the TMIG, and will be conducted in agreement with the Declaration of Helsinki. The findings of this study will be presented at international academic congresses and published in peer-reviewed international journals. Upon publication in a journal, we will also make the findings available on the TMIG homepage.

### **DISCUSSION**

This study addresses the paucity of data regarding the effects of RT and/or HMB supplementation in older women with reduced muscle mass, and the findings will provide insight regarding the potential synergistic effect of RT and HMB supplementation on muscle mass, muscle strength, and physical performance. We will also examine the residual effects of such interventions over a 12-week observation period, as such findings may help understand the potential of non-pharmaceutical treatment for sarcopenia.

Literature reports regarding the individual effect of HMB supplementation on muscle properties and physical performance in older people are encouraging.<sup>[21 22 43]</sup> However, to our knowledge, only two studies have evaluated the combined effect of RT and HMB supplementation in older populations.<sup>[14 15]</sup> Specifically, Vukovich et al. enrolled 31 adults aged >70 years and reported significant muscle mass gain after 12 weeks of exercise with HMB supplementation but not after exercise with placebo (*P* for interaction, 0.08).<sup>[14]</sup> On the other hand, Stout et al. enrolled 36 adults aged >65 years and reported significant improvement in muscle quality, calculated as muscle strength relative to muscle

1  
2  
3  
4  
5  
6 mass, after 24 weeks of HMB supplementation alone (i.e., no exercise).<sup>[15]</sup> It remains unclear whether  
7 the combined program provides higher benefits. These previous studies had a relatively small sample  
8 size, which might increase  $\beta$ -error; moreover, the participants were relatively healthy and had almost  
9 normal muscle mass, suggesting that they may have benefited less from HMB supplementation. As  
10 completely controlled groups were not previously included, the potential synergy between RT and  
11 HMB supplementation remains unclear. The present study will address these limitations and serve as  
12 the first investigation of the acute and residual, independent and combined effects of RT and HMB  
13 supplementation, which will be conducted in a larger sample of older adults with reduced muscle mass.  
14 The randomized, double-blind, placebo-controlled design will minimize the risk of selection,  
15 performance, and detection bias, and will support the generalizability of the results. One limitation is  
16 that, in addition to machine-based RT, the intervention involves body weight, elastic band, and ankle  
17 weight RT, which do not provide objective information regarding muscle loading; on the other hand,  
18 such RT programs are more suitable for older adults and will be more feasible in daily practice.  
19 Another limitation is that all participants will be older women, which will preclude generalization of  
20 our findings to men.  
21  
22  
23  
24  
25  
26  
27  
28  
29  
30  
31  
32  
33  
34  
35  
36  
37  
38  
39  
40  
41  
42  
43  
44  
45  
46  
47  
48  
49  
50  
51  
52  
53  
54  
55  
56  
57  
58  
59  
60

## DISCLOSURES

### Acknowledgments

We are grateful to the participants and the staff members of the Tokyo Metropolitan Institute of Gerontology.

### Authors' contributions

YO and HK conceived the study, designed the study protocol, participated in the coordination of the study (recruitment and screening), and wrote the manuscript. NK participated in the coordination of the study and helped manage data collection. KW and TK contributed to designing the study protocol, conducted the randomization, and have been maintaining allocation concealment. DM contributed to designing the study protocol and negotiated a contract with the provider of the intervention products. All authors read and approved the final manuscript. HK is principal investigator in this trial.

### Funding

This study is financially supported by Kyowa Co., Ltd., Tokyo, Japan (no grant number) and is being conducted as a joint research effort of the Tokyo Metropolitan Institute of Gerontology, University of Tsukuba, and Kyowa Co., Ltd.

### Competing interests

The intervention products (HMB and placebo supplements) were provided by Kyowa Co., Ltd. DM is employed by Kyowa Co., Ltd. The funder is not involved in subject recruitment, intervention, data collection, data analysis, or preparation of the manuscript.

### Patient consent

Obtained.

### Ethics approval

Approved by the Ethics Committee of the Tokyo Metropolitan Institute of Gerontology on 15 September 2017.

### Data sharing statement

Data collection is ongoing and will be handled anonymously. The results will be offered for publication in a peer-reviewed journal and, afterwards, will be available on the TMIG website.



**REFERENCES**

1. Cruz-Jentoft AJ, Baeyens JP, Bauer JM, et al. Sarcopenia: European consensus on definition and diagnosis: report of the European Working Group on Sarcopenia in Older People. *Age Ageing* 2010;39(4):412-23.
2. Landi F, Liperoti R, Russo A, et al. Sarcopenia as a risk factor for falls in elderly individuals: results from the iLSIRENTE study. *Clin Nutr* 2012;31(5):652-8.
3. Hirani V, Blyth F, Naganathan V, et al. Sarcopenia is associated with incident disability, institutionalization, and mortality in community-dwelling older men: the Concord Health and Ageing in Men Project. *J Am Med Dir Assoc* 2015;16(7):607-13.
4. Bianchi L, Ferrucci L, Cherubini A, et al. The predictive value of the EWGSOP definition of sarcopenia: results from the InCHIANTI study. *J Gerontol A Biol Sci Med Sci* 2016;71(2):259-64.
5. Cermak NM, Res PT, de Groot LC, et al. Protein supplementation augments the adaptive response of skeletal muscle to resistance-type exercise training: a meta-analysis. *Am J Clin Nutr* 2012;96(6):1454-64.
6. Malafarina V, Uriz-Otano F, Iniesta R, et al. Effectiveness of nutritional supplementation on muscle mass in treatment of sarcopenia in old age: a systematic review. *J Am Med Dir Assoc* 2013;14(1):10-7.
7. Liao CD, Tsao JY, Wu YT, et al. Effects of protein supplementation combined with resistance exercise on body composition and physical function in older adults: a systematic review and meta-analysis. *Am J Clin Nutr* 2017;106(4):1078-91.
8. Finger D, Goltz FR, Umpierre D, et al. Effects of protein supplementation in older adults undergoing resistance training: a systematic review and meta-analysis. *Sports Med* 2015;45(2):245-55.
9. Cruz-Jentoft AJ, Landi F, Schneider SM, et al. Prevalence of and interventions for sarcopenia in ageing adults: a systematic review. Report of the International Sarcopenia Initiative (EWGSOP and IWGS). *Age Ageing* 2014;43(6):748-59.
10. Wilson JM, Fitschen PJ, Campbell B, et al. International Society of Sports Nutrition Position Stand: beta-hydroxy-beta-methylbutyrate (HMB). *J Int Soc Sports Nutr* 2013;10(1):6.
11. Van Koeveering M, Nissen S. Oxidation of leucine and alpha-ketoisocaproate to beta-hydroxy-beta-methylbutyrate in vivo. *Am J Physiol* 1992;262(1 Pt 1):E27-31.
12. Fitschen PJ, Wilson GJ, Wilson JM, et al. Efficacy of beta-hydroxy-beta-methylbutyrate supplementation in elderly and clinical populations. *Nutrition* 2013;29(1):29-36.
13. Molfino A, Gioia G, Rossi Fanelli F, et al. Beta-hydroxy-beta-methylbutyrate supplementation in health and disease: a systematic review of randomized trials. *Amino Acids* 2013;45(6):1273-92.
14. Vukovich MD, Stubbs NB, Bohlken RM. Body composition in 70-year-old adults responds to dietary beta-hydroxy-beta-methylbutyrate similarly to that of young adults. *J Nutr* 2001;131(7):2049-52.
15. Stout JR, Smith-Ryan AE, Fukuda DH, et al. Effect of calcium beta-hydroxy-beta-methylbutyrate



- (CaHMB) with and without resistance training in men and women 65+ yrs: a randomized, double-blind pilot trial. *Exp Gerontol* 2013;48(11):1303-10.
16. Chen LK, Liu LK, Woo J, et al. Sarcopenia in Asia: consensus report of the Asian Working Group for Sarcopenia. *J Am Med Dir Assoc* 2014;15(2):95-101.
17. Kim HK, Suzuki T, Saito K, et al. Effects of exercise and amino acid supplementation on body composition and physical function in community-dwelling elderly Japanese sarcopenic women: a randomized controlled trial. *J Am Geriatr Soc* 2012;60(1):16-23.
18. Kim H, Suzuki T, Kim M, et al. Effects of exercise and milk fat globule membrane (MFGM) supplementation on body composition, physical function, and hematological parameters in community-dwelling frail Japanese women: a randomized double blind, placebo-controlled, follow-up trial. *PLoS One* 2015;10(2):e0116256.
19. Kim H, Kim M, Kojima N, et al. Exercise and nutritional supplementation on community-dwelling elderly Japanese women with sarcopenic obesity: a randomized controlled trial. *J Am Med Dir Assoc* 2016;17(11):1011-19.
20. Wu H, Xia Y, Jiang J, et al. Effect of beta-hydroxy-beta-methylbutyrate supplementation on muscle loss in older adults: a systematic review and meta-analysis. *Arch Gerontol Geriatr* 2015;61(2):168-75.
21. Flakoll P, Sharp R, Baier S, et al. Effect of beta-hydroxy-beta-methylbutyrate, arginine, and lysine supplementation on strength, functionality, body composition, and protein metabolism in elderly women. *Nutrition* 2004;20(5):445-51.
22. Baier S, Johannsen D, Abumrad N, et al. Year-long changes in protein metabolism in elderly men and women supplemented with a nutrition cocktail of beta-hydroxy-beta-methylbutyrate (HMB), L-arginine, and L-lysine. *JPEN J Parenter Enteral Nutr* 2009;33(1):71-82.
23. Nissen S, Sharp RL, Panton L, et al.  $\beta$ -hydroxy- $\beta$ -methylbutyrate (HMB) supplementation in humans is safe and may decrease cardiovascular risk factors. *J Nutr* 2000;130(8):1937-45.
24. Janssen I, Baumgartner RN, Ross R, et al. Skeletal muscle cutpoints associated with elevated physical disability risk in older men and women. *Am J Epidemiol* 2004;159(4):413-21.
25. Kim M, Shinkai S, Murayama H, et al. Comparison of segmental multifrequency bioelectrical impedance analysis with dual-energy X-ray absorptiometry for the assessment of body composition in a community-dwelling older population. *Geriatr Gerontol Int* 2015;15(8):1013-22.
26. Kim M, Kim H. Accuracy of segmental multi-frequency bioelectrical impedance analysis for assessing whole-body and appendicular fat mass and lean soft tissue mass in frail women aged 75 years and older. *Eur J Clin Nutr* 2013;67(4):395-400.
27. Kojima N, Kim H, Saito K, et al. Association of knee-extension strength with instrumental activities of daily living in community-dwelling older adults. *Geriatr Gerontol Int* 2014;14(3):674-80.

- 1  
2  
3  
4  
5  
6 28. Kim H, Suzuki T, Yoshida Y, et al. Effectiveness of multidimensional exercises for the treatment of  
7 stress urinary incontinence in elderly community-dwelling Japanese women: a randomized,  
8 controlled, crossover trial. *J Am Geriatr Soc* 2007;55(12):1932-9.  
9
- 10 29. Shinkai S, Watanabe S, Kumagai S, et al. Walking speed as a good predictor for the onset of functional  
11 dependence in a Japanese rural community population. *Age Ageing* 2000;29(5):441-6.  
12
- 13 30. Podsiadlo D, Richardson S. The timed "Up & Go": a test of basic functional mobility for frail elderly  
14 persons. *J Am Geriatr Soc* 1991;39(2):142-8.  
15
- 16 31. Bohannon RW, Bubela DJ, Magasi SR, et al. Sit-to-stand test: performance and determinants across the  
17 age-span. *Isokinet Exerc Sci* 2010;18(4):235-40.  
18
- 19 32. Pillen S, Tak RO, Zwarts MJ, et al. Skeletal muscle ultrasound: correlation between fibrous tissue and  
20 echo intensity. *Ultrasound Med Biol* 2009;35(3):443-6.  
21
- 22 33. Nishihara K, Kawai H, Hayashi H, et al. Frequency analysis of ultrasonic echo intensities of the skeletal  
23 muscle in elderly and young individuals. *Clin Interv Aging* 2014;9:1471-8.  
24
- 25 34. Takema Y, Yorimoto Y, Kawai M, et al. Age-related changes in the elastic properties and thickness of  
26 human facial skin. *Br J Dermatol* 1994;131(5):641-8.  
27
- 28 35. Ryu HS, Joo YH, Kim SO, et al. Influence of age and regional differences on skin elasticity as measured  
29 by the Cutometer. *Skin Res Technol* 2008;14(3):354-8.  
30
- 31 36. Kobayashi S, Murakami K, Sasaki S, et al. Comparison of relative validity of food group intakes  
32 estimated by comprehensive and brief-type self-administered diet history questionnaires against  
33 16 d dietary records in Japanese adults. *Public Health Nutr* 2011;14(7):1200-11.  
34
- 35 37. Kobayashi S, Honda S, Murakami K, et al. Both comprehensive and brief self-administered diet history  
36 questionnaires satisfactorily rank nutrient intakes in Japanese adults. *J Epidemiol* 2012;22(2):151-  
37 9.  
38
- 39 38. Craig CL, Marshall AL, Sjostrom M, et al. International physical activity questionnaire: 12-country  
40 reliability and validity. *Med Sci Sports Exerc* 2003;35(8):1381-95.  
41
- 42 39. Murase N, Katsumura T, Ueda C, et al. [Validity and reliability of Japanese version of International  
43 Physical Activity Questionnaire]. *Journal of Health and Welfare Statistics* 2002;49(11):1-9.  
44
- 45 40. Koyano W, Shibata H, Nakazato K, et al. Measurement of competence: reliability and validity of the  
46 TMIG Index of Competence. *Arch Gerontol Geriatr* 1991;13(2):103-16.  
47
- 48 41. Awata S, Bech P, Koizumi Y, et al. Validity and utility of the Japanese version of the WHO-Five Well-  
49 Being Index in the context of detecting suicidal ideation in elderly community residents. *Int*  
50 *Psychogeriatr* 2007;19(1):77-88.  
51
- 52 42. Faul F, Erdfelder E, Lang AG, et al. G\*Power 3: a flexible statistical power analysis program for the  
53 social, behavioral, and biomedical sciences. *Behav Res Methods* 2007;39(2):175-91.  
54
- 55 43. Berton L, Bano G, Carraro S, et al. Effect of oral beta-hydroxy-beta-methylbutyrate (HMB)  
56 supplementation on physical performance in healthy old women over 65 years: an open label  
57  
58  
59  
60

1  
2  
3  
4  
5  
6 randomized controlled trial. *PLoS One* 2015;10(11):e0141757.  
7  
8  
9  
10  
11  
12  
13  
14  
15  
16  
17  
18  
19  
20  
21  
22  
23  
24  
25  
26  
27  
28  
29  
30  
31  
32  
33  
34  
35  
36  
37  
38  
39  
40  
41  
42  
43  
44  
45  
46  
47  
48  
49  
50  
51  
52  
53  
54  
55  
56  
57  
58  
59  
60

For peer review only

**FIGURE LEGENDS**

Figure 1. Study flowchart covering participant recruitment and enrolment, group allocation, intervention, observation, and data analysis

A second intervention will be provided after the follow-up assessment, in agreement with ethical principles. However, only data from the highlighted fields will be included in the analysis.

For peer review only

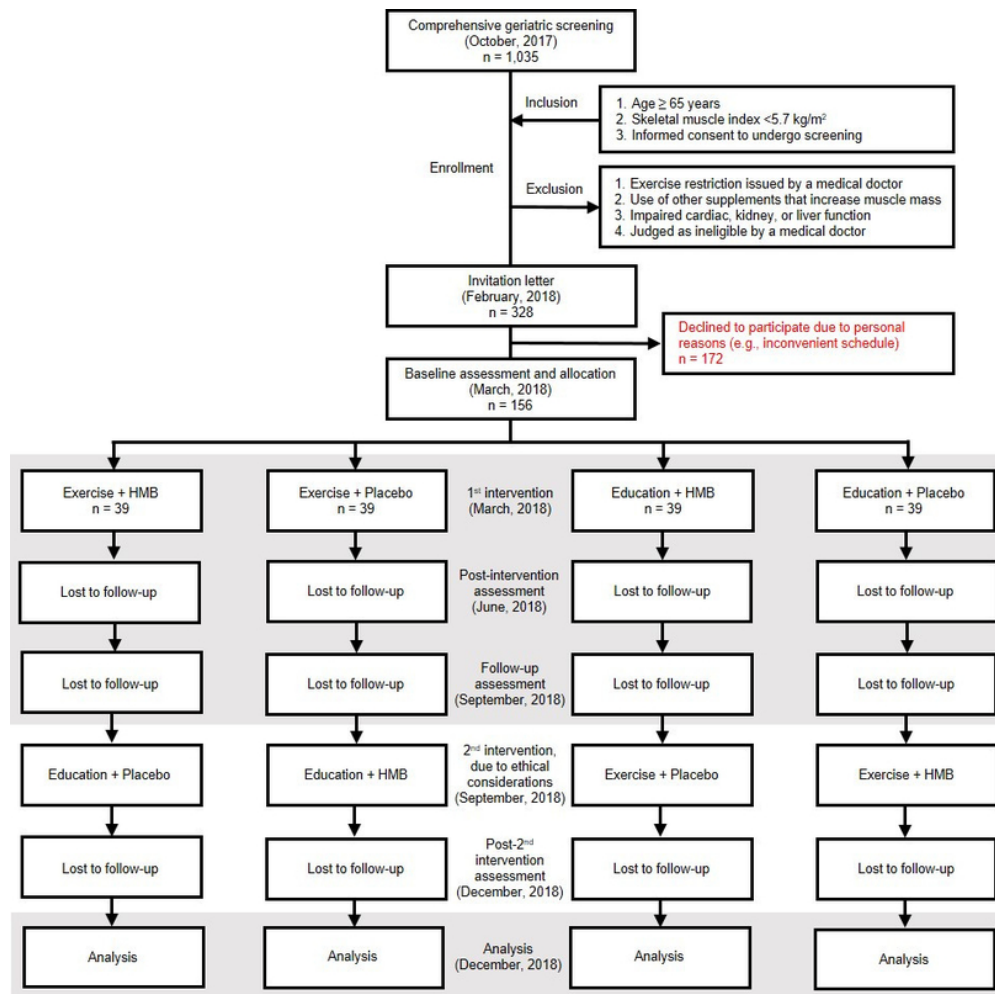

Figure 1. Study flowchart covering participant recruitment and enrolment, group allocation, intervention, observation, and data analysis  
 A second intervention will be provided after the follow-up assessment, in agreement with ethical principles. However, only data from the highlighted fields will be included in the analysis.

68x68mm (300 x 300 DPI)



SPIRIT 2013 Checklist: Recommended items to address in a clinical trial protocol and related documents\*

| Section/item                                                        | Item No | Description                                                                                                                                                                                                                                                                                                                                                                    | Reference        |
|---------------------------------------------------------------------|---------|--------------------------------------------------------------------------------------------------------------------------------------------------------------------------------------------------------------------------------------------------------------------------------------------------------------------------------------------------------------------------------|------------------|
| <b>Administrative information</b>                                   |         |                                                                                                                                                                                                                                                                                                                                                                                |                  |
| Title                                                               | 1       | Descriptive title identifying the study design, population, interventions, and, if applicable, trial acronym                                                                                                                                                                                                                                                                   | pg. 1            |
| Trial registration                                                  | 2a      | Trial identifier and registry name. If not yet registered, name of intended registry                                                                                                                                                                                                                                                                                           | pg. 2            |
|                                                                     | 2b      | All items from the World Health Organization Trial Registration Data Set                                                                                                                                                                                                                                                                                                       | N/A              |
| Protocol version                                                    | 3       | Date and version identifier                                                                                                                                                                                                                                                                                                                                                    | N/A              |
| Funding                                                             | 4       | Sources and types of financial, material, and other support                                                                                                                                                                                                                                                                                                                    | pg. 14           |
| Roles and responsibilities                                          | 5a      | Names, affiliations, and roles of protocol contributors                                                                                                                                                                                                                                                                                                                        | pg. 1            |
|                                                                     | 5b      | Name and contact information for the trial sponsor                                                                                                                                                                                                                                                                                                                             | pg. 14           |
|                                                                     | 5c      | Role of study sponsor and funders, if any, in study design; collection, management, analysis, and interpretation of data; writing of the report; and the decision to submit the report for publication, including whether they will have ultimate authority over any of these activities                                                                                       | pg. 14           |
|                                                                     | 5d      | Composition, roles, and responsibilities of the coordinating centre, steering committee, endpoint adjudication committee, data management team, and other individuals or groups overseeing the trial, if applicable (see Item 21a for data monitoring committee)                                                                                                               | N/A              |
| <b>Introduction</b>                                                 |         |                                                                                                                                                                                                                                                                                                                                                                                |                  |
| Background and rationale                                            | 6a      | Description of research question and justification for undertaking the trial, including summary of relevant studies (published and unpublished) examining benefits and harms for each intervention                                                                                                                                                                             | pg. 3            |
|                                                                     | 6b      | Explanation for choice of comparators                                                                                                                                                                                                                                                                                                                                          | pg. 3            |
| Objectives                                                          | 7       | Specific objectives or hypotheses                                                                                                                                                                                                                                                                                                                                              | pg. 3            |
| Trial design                                                        | 8       | Description of trial design including type of trial (eg, parallel group, crossover, factorial, single group), allocation ratio, and framework (eg, superiority, equivalence, noninferiority, exploratory)                                                                                                                                                                      | pg. 3-4          |
| <b>Methods: Participants, interventions, and outcomes</b>           |         |                                                                                                                                                                                                                                                                                                                                                                                |                  |
| Study setting                                                       | 9       | Description of study settings (eg, community clinic, academic hospital) and list of countries where data will be collected. Reference to where list of study sites can be obtained                                                                                                                                                                                             | pg. 4, 5         |
| Eligibility criteria                                                | 10      | Inclusion and exclusion criteria for participants. If applicable, eligibility criteria for study centres and individuals who will perform the interventions (eg, surgeons, psychotherapists)                                                                                                                                                                                   | pg. 5, Fig. 1    |
| Interventions                                                       | 11a     | Interventions for each group with sufficient detail to allow replication, including how and when they will be administered                                                                                                                                                                                                                                                     | pg. 6, 7; Fig. 1 |
|                                                                     | 11b     | Criteria for discontinuing or modifying allocated interventions for a given trial participant (eg, drug dose change in response to harms, participant request, or improving/worsening disease)                                                                                                                                                                                 | pg. 11           |
|                                                                     | 11c     | Strategies to improve adherence to intervention protocols, and any procedures for monitoring adherence (eg, drug tablet return, laboratory tests)                                                                                                                                                                                                                              | pg. 7, 10, 11    |
|                                                                     | 11d     | Relevant concomitant care and interventions that are permitted or prohibited during the trial                                                                                                                                                                                                                                                                                  | pg. 6            |
| Outcomes                                                            | 12      | Primary, secondary, and other outcomes, including the specific measurement variable (eg, systolic blood pressure), analysis metric (eg, change from baseline, final value, time to event), method of aggregation (eg, median, proportion), and time point for each outcome. Explanation of the clinical relevance of chosen efficacy and harm outcomes is strongly recommended | pg. 11           |
| Participant timeline                                                | 13      | Time schedule of enrolment, interventions (including any run-ins and washouts), assessments, and visits for participants. A schematic diagram is highly recommended (see Figure)                                                                                                                                                                                               | pg. 5, Fig. 1    |
| Sample size                                                         | 14      | Estimated number of participants needed to achieve study objectives and how it was determined, including clinical and statistical assumptions supporting any sample size calculations                                                                                                                                                                                          | pg. 11           |
| Recruitment                                                         | 15      | Strategies for achieving adequate participant enrolment to reach target sample size                                                                                                                                                                                                                                                                                            | pg. 11           |
| <b>Methods: Assignment of interventions (for controlled trials)</b> |         |                                                                                                                                                                                                                                                                                                                                                                                |                  |

|    |                                                           |     |                                                                                                                                                                                                                                                                                                                                                                                                              |                     |
|----|-----------------------------------------------------------|-----|--------------------------------------------------------------------------------------------------------------------------------------------------------------------------------------------------------------------------------------------------------------------------------------------------------------------------------------------------------------------------------------------------------------|---------------------|
| 1  | Allocation:                                               |     |                                                                                                                                                                                                                                                                                                                                                                                                              |                     |
| 2  | Sequence generation                                       | 16a | Method of generating the allocation sequence (eg, computer-generated random numbers), and list of any factors for stratification. To reduce predictability of a random sequence, details of any planned restriction (eg, blocking) should be provided in a separate document that is unavailable to those who enrol participants or assign interventions                                                     | pg. 6               |
| 3  | Allocation concealment mechanism                          | 16b | Mechanism of implementing the allocation sequence (eg, central telephone; sequentially numbered, opaque, sealed envelopes), describing any steps to conceal the sequence until interventions are assigned                                                                                                                                                                                                    | pg. 6, 7            |
| 4  | Implementation                                            | 16c | Who will generate the allocation sequence, who will enrol participants, and who will assign participants to interventions                                                                                                                                                                                                                                                                                    | pg. 6, 7            |
| 5  | Blinding (masking)                                        | 17a | Who will be blinded after assignment to interventions (eg, trial participants, care providers, outcome assessors, data analysts), and how                                                                                                                                                                                                                                                                    | pg. 6, 7            |
| 6  |                                                           | 17b | If blinded, circumstances under which unblinding is permissible, and procedure for revealing a participant's allocated intervention during the trial                                                                                                                                                                                                                                                         | pg. 6               |
| 7  | <b>Methods: Data collection, management, and analysis</b> |     |                                                                                                                                                                                                                                                                                                                                                                                                              |                     |
| 8  | Data collection methods                                   | 18a | Plans for assessment and collection of outcome, baseline, and other trial data, including any related processes to promote data quality (eg, duplicate measurements, training of assessors) and a description of study instruments (eg, questionnaires, laboratory tests) along with their reliability and validity, if known. Reference to where data collection forms can be found, if not in the protocol | pg. 7-11            |
| 9  |                                                           | 18b | Plans to promote participant retention and complete follow-up, including list of any outcome data to be collected for participants who discontinue or deviate from intervention protocols                                                                                                                                                                                                                    | pg. 7, 10, 11       |
| 10 | Data management                                           | 19  | Plans for data entry, coding, security, and storage, including any related processes to promote data quality (eg, double data entry; range checks for data values). Reference to where details of data management procedures can be found, if not in the protocol                                                                                                                                            | pg. 11              |
| 11 | Statistical methods                                       | 20a | Statistical methods for analysing primary and secondary outcomes. Reference to where other details of the statistical analysis plan can be found, if not in the protocol                                                                                                                                                                                                                                     | pg. 11              |
| 12 |                                                           | 20b | Methods for any additional analyses (eg, subgroup and adjusted analyses)                                                                                                                                                                                                                                                                                                                                     | pg. 11-12           |
| 13 |                                                           | 20c | Definition of analysis population relating to protocol non-adherence (eg, as randomised analysis), and any statistical methods to handle missing data (eg, multiple imputation)                                                                                                                                                                                                                              | pg. 12              |
| 14 | <b>Methods: Monitoring</b>                                |     |                                                                                                                                                                                                                                                                                                                                                                                                              |                     |
| 15 | Data monitoring                                           | 21a | Composition of data monitoring committee (DMC); summary of its role and reporting structure; statement of whether it is independent from the sponsor and competing interests; and reference to where further details about its charter can be found, if not in the protocol. Alternatively, an explanation of why a DMC is not needed                                                                        | N/A                 |
| 16 |                                                           | 21b | Description of any interim analyses and stopping guidelines, including who will have access to these interim results and make the final decision to terminate the trial                                                                                                                                                                                                                                      | N/A                 |
| 17 | Harms                                                     | 22  | Plans for collecting, assessing, reporting, and managing solicited and spontaneously reported adverse events and other unintended effects of trial interventions or trial conduct                                                                                                                                                                                                                            | pg. 11              |
| 18 | Auditing                                                  | 23  | Frequency and procedures for auditing trial conduct, if any, and whether the process will be independent from investigators and the sponsor                                                                                                                                                                                                                                                                  | N/A                 |
| 19 | <b>Ethics and dissemination</b>                           |     |                                                                                                                                                                                                                                                                                                                                                                                                              |                     |
| 20 | Research ethics approval                                  | 24  | Plans for seeking research ethics committee/institutional review board (REC/IRB) approval                                                                                                                                                                                                                                                                                                                    | Approved; pg. 5, 12 |
| 21 | Protocol amendments                                       | 25  | Plans for communicating important protocol modifications (eg, changes to eligibility criteria, outcomes, analyses) to relevant parties (eg, investigators, REC/IRBs, trial participants, trial registries, journals, regulators)                                                                                                                                                                             | pg. 5               |
| 22 | Consent or assent                                         | 26a | Who will obtain informed consent or assent from potential trial participants or authorised surrogates, and how (see Item 32)                                                                                                                                                                                                                                                                                 | pg. 14              |
| 23 |                                                           | 26b | Additional consent provisions for collection and use of participant data and biological specimens in ancillary studies, if applicable                                                                                                                                                                                                                                                                        | N/A                 |
| 24 | Confidentiality                                           | 27  | How personal information about potential and enrolled participants will be collected, shared, and maintained in order to protect confidentiality before, during, and after the trial                                                                                                                                                                                                                         | pg. 5               |
| 25 | Declaration of interests                                  | 28  | Financial and other competing interests for principal investigators for the overall trial and each study site                                                                                                                                                                                                                                                                                                | pg. 14              |
| 26 | Access to data                                            | 29  | Statement of who will have access to the final trial dataset, and disclosure of contractual agreements that limit such access for investigators                                                                                                                                                                                                                                                              | pg. 14              |
| 27 | Ancillary and post-trial care                             | 30  | Provisions, if any, for ancillary and post-trial care, and for compensation to those who suffer harm from trial participation                                                                                                                                                                                                                                                                                | pg. 11              |

|    |                            |     |                                                                                                                                                                                                                                                                                     |
|----|----------------------------|-----|-------------------------------------------------------------------------------------------------------------------------------------------------------------------------------------------------------------------------------------------------------------------------------------|
| 1  |                            |     |                                                                                                                                                                                                                                                                                     |
| 2  | Dissemination policy       | 31a | Plans for investigators and sponsor to communicate trial results to participants, healthcare professionals, the public, and other relevant groups (eg, via publication, reporting in results databases, or other data sharing arrangements), including any publication restrictions |
| 3  |                            |     | pg. 14                                                                                                                                                                                                                                                                              |
| 4  |                            | 31b | Authorship eligibility guidelines and any intended use of professional writers                                                                                                                                                                                                      |
| 5  |                            | 31c | Plans, if any, for granting public access to the full protocol, participant-level dataset, and statistical code                                                                                                                                                                     |
| 6  |                            |     | pg. 14                                                                                                                                                                                                                                                                              |
| 7  | <b>Appendices</b>          |     |                                                                                                                                                                                                                                                                                     |
| 8  | Informed consent materials | 32  | Model consent form and other related documentation given to participants and authorised surrogates                                                                                                                                                                                  |
| 9  |                            |     | pg. 5                                                                                                                                                                                                                                                                               |
| 10 | Biological specimens       | 33  | Plans for collection, laboratory evaluation, and storage of biological specimens for genetic or molecular analysis in the current trial and for future use in ancillary studies, if applicable                                                                                      |
| 11 |                            |     | N/A                                                                                                                                                                                                                                                                                 |

12 \*It is strongly recommended that this checklist be read in conjunction with the SPIRIT 2013  
 13 Explanation & Elaboration for important clarification on the items. Amendments to the  
 14 protocol should be tracked and dated. The SPIRIT checklist is copyrighted by the SPIRIT  
 15 Group under the Creative Commons "[Attribution-NonCommercial-NoDerivs 3.0 Unported](https://creativecommons.org/licenses/by-nc-nd/3.0/)"  
 16 license.  
 17  
 18  
 19  
 20  
 21  
 22  
 23  
 24  
 25  
 26  
 27  
 28  
 29  
 30  
 31  
 32  
 33  
 34  
 35  
 36  
 37  
 38  
 39  
 40  
 41  
 42  
 43  
 44  
 45  
 46  
 47  
 48  
 49  
 50  
 51  
 52  
 53  
 54  
 55  
 56  
 57  
 58  
 59  
 60



# BMJ Open

## Effects of resistance training and/or beta-hydroxy-beta-methylbutyrate supplementation on muscle mass, muscle strength, and physical performance in older women with reduced muscle mass: protocol for a randomized, double-blind, placebo-controlled trial

|                                 |                                                                                                                                                                                                                                                                                                                                                                                                                                                                                                                                                                      |
|---------------------------------|----------------------------------------------------------------------------------------------------------------------------------------------------------------------------------------------------------------------------------------------------------------------------------------------------------------------------------------------------------------------------------------------------------------------------------------------------------------------------------------------------------------------------------------------------------------------|
| Journal:                        | <i>BMJ Open</i>                                                                                                                                                                                                                                                                                                                                                                                                                                                                                                                                                      |
| Manuscript ID                   | bmjopen-2018-025723.R2                                                                                                                                                                                                                                                                                                                                                                                                                                                                                                                                               |
| Article Type:                   | Protocol                                                                                                                                                                                                                                                                                                                                                                                                                                                                                                                                                             |
| Date Submitted by the Author:   | 12-Jan-2019                                                                                                                                                                                                                                                                                                                                                                                                                                                                                                                                                          |
| Complete List of Authors:       | Osuka, Yosuke; Tokyo Metropolitan Institute of Gerontology, Research Team for Promoting Independence of the Elderly<br>Kojima, Narumi; Tokyo Metropolitan Institute of Gerontology, Research Team for Promoting Independence of the Elderly<br>Wakaba, Kyohsuke; University of Tsukuba, Faculty of Health and Sport Sciences<br>Miyachi, Daiji; Kyowa Co., Ltd<br>Tanaka, Kiyoji; University of Tsukuba, Faculty of Health and Sport Sciences<br>Kim, Hunkyung; Tokyo Metropolitan Institute of Gerontology, Research Team for Promoting Independence of the Elderly |
| <b>Primary Subject Heading</b>: | Nutrition and metabolism                                                                                                                                                                                                                                                                                                                                                                                                                                                                                                                                             |
| Secondary Subject Heading:      | Sports and exercise medicine                                                                                                                                                                                                                                                                                                                                                                                                                                                                                                                                         |
| Keywords:                       | sarcopenia, exercise and nutrition, muscle mass and strength, physical performance, RCT                                                                                                                                                                                                                                                                                                                                                                                                                                                                              |
|                                 |                                                                                                                                                                                                                                                                                                                                                                                                                                                                                                                                                                      |

SCHOLARONE™  
Manuscripts

1  
2  
3  
4  
5  
6 **Effects of resistance training and/or beta-hydroxy-beta-methylbutyrate supplementation on**  
7 **muscle mass, muscle strength, and physical performance in older women with reduced muscle**  
8 **mass: protocol for a randomized, double-blind, placebo-controlled trial**  
9

10  
11 Yosuke Osuka<sup>1</sup>, Narumi Kojima<sup>1</sup>, Kyohsuke Wakaba<sup>2</sup>, Daiji Miyauchi<sup>3</sup>, Kiyoji Tanaka<sup>2</sup>, and  
12 Hunkyung Kim<sup>1</sup>  
13  
14

15  
16 <sup>1</sup>Research Team for Promoting Independence of the Elderly, Tokyo Metropolitan Institute of  
17 Gerontology, Tokyo, Japan

18 <sup>2</sup>Faculty of Health and Sport Sciences, University of Tsukuba, Ibaraki, Japan

19 <sup>3</sup>Kyowa Co., Ltd., Tokyo, Japan.  
20  
21  
22

23  
24 **Corresponding author**

25 Yosuke Osuka, PhD

26 Research Team for Promoting Independence of the Elderly

27 Tokyo Metropolitan Institute of Gerontology

28 35-2, Sakae-cho, Itabashi-ku, Tokyo, 173-0015, Japan

29 E-mail: osuka@tmig.or.jp

30 Phone: +81-3-3964-3241  
31  
32  
33  
34  
35

36 **Word count:** 3990/4000 words  
37  
38  
39  
40  
41  
42  
43  
44  
45  
46  
47  
48  
49  
50  
51  
52  
53  
54  
55  
56  
57  
58  
59  
60

## ABSTRACT

### Introduction

Resistance training (RT) and nutritional supplementation seem to have beneficial effects on muscle properties and physical performance in older adults. However, the reported effects of specific RT programs and supplementation prescriptions vary among studies. The present study aims to examine the acute and residual effects of RT and/or beta-hydroxy-beta-methylbutyrate (HMB) supplementation on muscle mass, muscle strength, and physical performance in older women with reduced muscle mass.

### Methods and analysis

This is a randomized, double-blind, placebo-controlled trial. Older women fitting the eligibility criteria were recruited in February 2018 from a population-based sample identified via a screening conducted in October 2017. In March 2018, the 156 participants were randomly allocated to undergo one of four interventions (RT+HMB, RT+placebo, education+HMB, and education+placebo) for 12 weeks. Supervised RT consisted of body weight, elastic band, ankle weight, and machine-based exercises twice weekly at the Tokyo Metropolitan Institute of Gerontology. Each participant ingested HMB (1,200 mg) or placebo supplements once daily. Sessions of education not associated with sarcopenia treatment were conducted every two weeks. Post-intervention follow-up will be conducted for 12 weeks, until September 2018. The study includes assessments conducted in March (baseline), June (post-intervention), and September 2018 (follow-up). The primary outcome is the longitudinal change in muscle mass. Secondary outcomes include the longitudinal changes in muscle strength, physical performance, muscle thickness, muscle quality, blood counts, blood biochemistry, calf circumference, skin viscoelasticity, habitual dietary intake, habitual physical activity levels, functional capacity, and health-related quality of life. Intention-to-treat analyses will be conducted.

### Ethics and dissemination

The study protocol was approved by the Ethics Committee of the Tokyo Metropolitan Institute of Gerontology, Japan. The study is being conducted according to the principles of the Declaration of Helsinki. The findings will be presented at international academic congresses and published in peer-reviewed international journals.

### Trial registration

URL: [https://upload.umin.ac.jp/cgi-open-bin/ctr\\_e/ctr\\_view.cgi?recptno=R000032688](https://upload.umin.ac.jp/cgi-open-bin/ctr_e/ctr_view.cgi?recptno=R000032688)

**STRENGTHS AND LIMITATIONS OF THIS STUDY**

- To the best of our knowledge, this will be the first four-arm trial to examine the effects of resistance training and/or HMB supplementation among older adults with reduced muscle mass.
- The study will collect information about the residual effects of the intervention over an observation period of 12 weeks.
- The trial has a randomized, double-blind, placebo-controlled design, which supports the generalizability of the findings and minimizes the risk of selection, performance, and detection bias.
- In addition to machine-based exercises, the participants will also perform resistance training using body weight, ankle weights, and elastic bands, which will not provide objective information regarding muscle loading but which represents a more suitable prescription for older adults and a more feasible exercise routine to be performed on a daily basis.
- All participants will be older women, which limits generalization of the findings to men.

## INTRODUCTION

Sarcopenia is a syndrome characterised by progressive and generalized loss of skeletal muscle mass and strength.<sup>[1]</sup> In older adults, sarcopenia is associated with adverse health outcomes such as increased risk of incident falls,<sup>[2]</sup> reduced performance in instrumental or basic activities of daily living, hospitalization, institutionalization, and mortality.<sup>[3-4]</sup> To reduce the social burden of sarcopenia, it is important to develop prevention and treatment programs aimed to extend healthy life expectancy, especially in older people with high risk of sarcopenia.

Most sarcopenia prevention or treatment programs recommend a combination of resistance training (RT) and nutritional supplementation.<sup>[5-7]</sup> According to a meta-analysis of nine randomized control trials (RCTs) on the combined effect of protein supplementation and RT on muscle outcomes, such strategies may be effective for increasing fat-free mass among older adults.<sup>[8]</sup> Both the European Working Group on Sarcopenia in Older People and the International Working Group on Sarcopenia, which serve as international advisory committees on sarcopenia, have argued in favour of leucine and beta-hydroxy-beta-methylbutyrate (HMB) supplementation as complementary strategies for sarcopenia prevention or treatment.<sup>[9]</sup>

HMB is synthesized in skeletal muscle via transamination of leucine to alpha-ketoisocaproic acid (KIC) by aminotransferase.<sup>[10]</sup> It is estimated that only 5–10% of KIC is metabolized by KIC dioxygenase to produce HMB in the liver.<sup>[11]</sup> HMB supplementation is believed to exert beneficial effects on skeletal muscle by increasing protein synthesis through activation of the mammalian target of rapamycin and by decreasing protein catabolism through down-regulation of the ubiquitin proteasome pathway.<sup>[12]</sup> However, there are few studies on the combined effects of RT and HMB supplementation on muscle outcomes in older adults.<sup>[13]</sup> To our knowledge, two RCTs have examined such effects in elderly populations, but the participants were healthy older adults and the RCTs had a two-arm design.<sup>[14-15]</sup> Additionally, the residual effects of RT and/or HMB supplementation on muscle outcomes remain unclear. Thus, it is necessary to investigate the combined effect of RT and HMB supplementation in older populations with muscle wasting, and such studies should be designed as four-arm RCTs (RT-only, HMB supplementation-only, both, and none).<sup>[9]</sup>

The present study aims to examine the acute and residual effects of RT and/or HMB supplementation on muscle mass, muscle strength, and physical performance in older women with reduced muscle mass. We hypothesized that, compared to RT alone, HMB supplementation alone, and placebo, combined RT and HMB supplementation would provide higher benefit in terms of improving and maintaining muscle mass, muscle strength, and physical performance. These findings will provide new evidence regarding the effectiveness of non-pharmaceutical interventions for sarcopenia, and will be useful in the development of sarcopenia prevention and treatment programs in physically frail populations.

## METHODS AND ANALYSIS

### Study design, procedure, and ethics

In accordance with the SPIRIT (Standard Protocol Items: Recommendations for Interventional Trials) and CONSORT (Consolidated Standards of Reporting Trials) statements, we designed a randomized, double-blind, placebo-controlled trial to be conducted between March and September 2018 at the Tokyo Metropolitan Institute of Gerontology (TMIG), Tokyo, Japan. The study protocol was registered with the University Hospital Medical Information Network Clinical Trials Registry (UMIN-CTR) on 7 August 2017 (trial registration no. UMIN000028560) and was approved by the Ethics Committee of the TMIG on 15 September 2017.

Older women fitting the eligibility criteria were recruited in February 2018, from among a population-based sample identified via a screening conducted in October 2017. After recruitment, a four-arm intervention was conducted between March and June 2018. The participants will be followed until September 2018 to observe the residual effects of the intervention. After the observation period, all interventions will be available to all participants, in agreement with ethical principles. Amendments to the protocol will be disclosed on the UMIN-CTR page of the trial. The study involves assessments conducted in March (baseline), June (post-intervention), and September 2018 (follow-up). Before the baseline assessment, all participants received written and oral information from the researchers (YO, NK, and KH) regarding the study purpose, procedures, confidentiality of personal information, possible benefits, possible risks, and coping strategy for the risks. Only participants who provided written informed consent proceeded within the trial. The flow chart of the study is shown in Figure 1.

### Participants

To select the study sample, a population-based comprehensive geriatric survey was conducted as a screening assessment at the TMIG in October 2017. Invitation letters for the screening assessment were sent to 6,366 subjects randomly selected from the Basic Resident Register of the Itabashi ward, which is a special ward located in the northwest area of Tokyo. In total, 1,035 older women participated in the screening assessment. The inclusion criteria of this study were: (i) age  $\geq 65$  years; (ii) reduced muscle mass, defined as a skeletal muscle index  $< 5.7$  kg/m<sup>2</sup>, per the sarcopenia diagnosis consensus issued by the Asian Working Group for Sarcopenia<sup>[16]</sup>; and (iii) informed consent for undergoing screening. The exclusion criteria were: (i) exercise restriction issued by a medical doctor; (ii) use of other supplements known to increase muscle mass; (iii) impaired cardiac, kidney, or liver function; and (iv) judged as ineligible by a medical doctor. A sample of 328 women fitting the eligibility criteria received invitation letters regarding the study intervention, of whom 156 participated in the baseline assessment, whereas the remaining 172 declined to participate due to personal reasons.

### Randomization, allocation concealment, and blinding

A baseline assessment was conducted in March 2018. Afterwards, the participants were randomly

1  
2  
3  
4  
5  
6 allocated to four groups in a ratio of 1:1:1:1 based on a computer-generated randomization number.  
7 The allocation was conducted by two researchers from the University of Tsukuba (KW and KT). The  
8 allocation keys will be blinded from the researchers at the TMIG (YO, NK, and HK), participants,  
9 exercise trainer, analysts, and assessors until December 2018 in order to maintain allocation  
10 concealment. The researchers holding the allocation keys will not have contact with the participants.  
11  
12  
13

### 14 **Intervention**

15  
16 During the intervention and observational periods, all participants were instructed not to change their  
17 habitual dietary intake or physical activity levels.  
18  
19

#### 20 **RT program**

21  
22 Participants allocated to the RT program took part in 60-min exercise sessions on two non-consecutive  
23 days per week for 12 weeks. All sessions took place at the TMIG, under the supervision of a well-  
24 experienced exercise trainer who was not one of the researchers associated with the study. Each  
25 exercise session consisted of a 5-min warm-up exercise, a 50-min RT exercise, and a 5-min cool-down  
26 exercise. Warm-up and cool-down exercises included stretching activities for the shoulders, trunk,  
27 chest, hips, and hamstrings. RT consisted of chair-based (weeks 1–12), elastic band (weeks 5–7), ankle  
28 weight (weeks 7–12), and machine-based exercises (weeks 9–12). The chair-based exercise included  
29 heel raise, toe raise, knee extension, hip adduction using a rubber ball, and knee lift exercises from the  
30 sitting position, as well as squats. Additionally, heel raise and knee lift exercises were performed  
31 progressively from a seated to a standing position, and lateral leg raise exercises were performed while  
32 standing behind the chair and holding onto the back of the chair. Elastic band exercises included knee  
33 lift, hip adduction, and arm rowing exercises. Knee extension exercises in sitting position, as well as  
34 heel raise, knee lift, and lateral leg raise exercises in standing position also were performed using ankle  
35 weights of 0.5, 0.75, 1.0, or 1.5 kg, according to the physical condition of each participant. In the last  
36 4 weeks of the intervention, the participants performed five types of exercise (arm rowing, leg  
37 extension, hip lateral rotation, leg press, and trunk flexion) using dedicated RT machines (Mizuno  
38 Ltd., Tokyo, Japan). All exercises were performed as 1–3 sets of 8–10 repetitions with gradual loading.  
39 The number of sets and repetitions was increased based on the perceived exertion of each participant.  
40 Each movement was performed slowly, in 8 counts (increasing the load throughout the first 4 counts  
41 and decreasing it throughout the last 4 counts). The exercise trainer supervised the participants and  
42 provided verbal feedback to ensure sufficient tension was achieved in the target muscle groups.  
43 Exercise intensity was maintained at 12–14 points on the Borg Rate of Perceived Exertion scale. This  
44 RT program was based on a program employed successfully in our previous studies.<sup>[17-19]</sup>  
45  
46  
47  
48  
49  
50  
51  
52  
53  
54  
55  
56  
57

#### 58 **HMB and placebo supplementation**

1  
2  
3  
4  
5  
6 All participants were instructed to ingest active (calcium HMB) or placebo products provided by  
7 Kyowa Co., Ltd., Tokyo, Japan. The active products contain 30 mg of protein, 20 mg of fat, 3,500 mg  
8 of carbohydrates, 0.2 mg of sodium, 207 mg of calcium, and 1,200 mg of HMB. Placebo products do  
9 not include calcium or HMB, and the missing amounts are provided as carbohydrates. Both products  
10 are provided in powder form with the same flavour, appearance, and packaging. The two researchers  
11 (KW and KT) maintaining the allocation keys labelled the package with an identification code and  
12 sent the products to the researchers at the TMIG (YO, NK, and HK). The participants received the  
13 blinded product, which they were instructed to mix with 200 mL of water and ingest once a day after  
14 any meal. The participants were instructed to record the ingestion of products in a diary.

15  
16 While there are no clear recommendations regarding HMB supplementation, Wu et al. suggested a  
17 daily dose of 3,000 mg for older adults.<sup>[20]</sup> However, as body weight is lower among Japanese than  
18 among western elderly women,<sup>[17 21 22]</sup> we set the active dose at 1,200 mg HMB daily based on the  
19 positive results we previously obtained in a similar population of sarcopenic women<sup>[17]</sup> taking HMB  
20 at a daily dosage similar to that used in other studies (0.03 vs. 0.03–0.04 g/kg of body weight).<sup>[21 22]</sup>  
21 No adverse events associated with HMB supplementation have been reported.<sup>[23]</sup>

#### 22 23 24 25 26 27 28 29 30 Health education program

31 Participants allocated to the health education groups took part in six 60-min sessions (once every two  
32 weeks for 12 weeks) of health education not related to sarcopenia prevention but focused specifically  
33 on dementia prevention, prevention of bank transfer fraud, music therapy, nutrition and general health,  
34 oral care, and social education, each given at the TMIG by an expert in that field.

#### 35 36 37 38 39 Assessments

40 This study includes assessments conducted in March (baseline), June (post-intervention), and  
41 September 2018 (follow-up) at the TMIG. All assessors are TMIG employees who are not researchers  
42 and are blinded to group allocation.

#### 43 44 45 46 Body composition

47 Body composition assessments involve measuring the following muscle mass indices: whole-body  
48 fat-free mass; upper-extremity and lower-extremity lean mass; appendicular lean mass, as the sum of  
49 the upper- and lower-extremity lean mass; and skeletal mass index, as the appendicular lean mass  
50 divided by the height squared (kg/m<sup>2</sup>).<sup>[24]</sup> The body weight, fat mass, and percent fat are also obtained.  
51 Body composition measurements are conducted using the InBody720 device (Biospace Co., Ltd, Seoul,  
52 Korea), which was validated against dual-energy X-ray absorptiometry systems for estimating  
53 appendicular lean mass in community-dwelling older populations,<sup>[25]</sup> providing minimal within-day  
54 coefficients of variation for all six frequencies (0–1.9%).<sup>[26]</sup>



## Muscle strength

### *Knee extensor strength*

Peak isometric knee extensor strength in the dominant leg is measured in a sitting position. The assessor places the hand-held dynamometer ( $\mu$ Tas F-1; ANIMA, Tokyo, Japan) on the skin above the anterior ankle, at a level 5 cm above the tip of the lateral malleolus. The participants are instructed to extend the knee with maximum power starting from a knee joint angle of 90°.<sup>[27]</sup> After a few practice repetitions, the participants are measured twice, and the best result is retained.

### *Hip adductor strength*

Peak isometric hip adduction strength is also measured in a sitting position. The assessor places the hand-held dynamometer ( $\mu$ Tas F-1; ANIMA) at 3 cm proximal to the medial knee fissure and instructs the participant to exert maximal hip adduction force while compressing a 12-cm rod equipped with a dynamometer, keeping both knee joints at 90°.<sup>[28]</sup> After a few practice repetitions, the participants are measured twice, and the best result is retained.

### *Handgrip strength*

Handgrip strength is measured using a hand-held Smedley-type dynamometer. The participants are instructed to stand naturally, grip the device with their dominant hand, and squeeze as hard as possible.<sup>[29]</sup> The best result of two trials is retained.

## Physical performance

### *Usual and maximal gait speed*

Using a stopwatch, the usual and maximal gait speed are measured as the time taken to walk 5 m (between markers set at 3 m and 8 m of an 11-m walking path)<sup>[29]</sup> at the usual or maximal speed, respectively. Usual gait speed is measured once. Maximal gait speed is measured twice, and the best result is retained.

### *Timed up-and-go*

This test measures the time taken to stand up from the chair, walk to and around a marker placed 3 m away, return to the chair, and sit back down.<sup>[30]</sup> The participants are instructed to perform these movements as quickly as possible. The test is performed twice, and the best result is retained.

### *Five-repetition sit-to-stand*

This test measures the time taken to stand up from the chair until full knee and hip extension, sit back down, and repeat this movement five times as quickly as possible.<sup>[31]</sup> The participants are instructed to fold their arms across the chest, stand-up completely, and make firm contact when sitting. After a few practice repetitions, the test is performed twice, and the best result is retained.

## Muscle thickness and quality

1  
2  
3  
4  
5  
6 Muscle thickness is measured using a B-mode ultrasound device (Mysono U6; Samsung Medison,  
7 Seoul, Korea). The participants are instructed to lie on the back in a bed and extend the hip and knee  
8 until fully relaxed. The assessor performs a transverse scan by placing a linear probe (5–12 MHz) on  
9 the skin surface at the midpoint between the lateral epicondyle and the ipsilateral greater trochanter of  
10 the femur, perpendicular to the longitudinal axis of the quadriceps femoris muscle. To measure the  
11 thickness of the rectus femoris and vastus intermedius, an electronic calliper is used. Quadriceps  
12 femoris thickness is defined as the sum of the thickness of the rectus femoris and that of the vastus  
13 intermedius. The muscle quality of the rectus femoris is evaluated on ultrasound images processed  
14 using dedicated software (Adobe Photoshop CS6 version 13.0; Adobe Systems, San Jose, CA, USA)  
15 and is expressed as the brightness of the image on a scale from 0 (black) to 256 (white). Muscle echo  
16 intensity was shown to correlate significantly with interstitial fibrous tissue in muscle biopsy  
17 samples.<sup>[32]</sup> The protocol for assessing muscle thickness and quality is described in detail elsewhere.<sup>[33]</sup>  
18  
19  
20  
21  
22  
23  
24

#### 25 Blood biochemistry

26 Blood samples are collected from the antecubital vein. Analyses are carried out centrally in one  
27 laboratory (Health Sciences Research Institute, Inc., Kanagawa, Japan). Enzymatic methods are used  
28 to determine creatinine, cholesterol (total, high-density lipoprotein, low-density lipoprotein),  
29 triglyceride, blood glucose, and glycated haemoglobin levels. Reference methods recommended by  
30 the Japan Society of Clinical Chemistry are used to assess aspartate transaminase, alanine  
31 transaminase, lactate dehydrogenase, and creatinine kinase levels. Other assays include the urease  
32 method with glutamate dehydrogenase (for blood urea nitrogen), direct colorimetry (for Fe), flow  
33 cytometry (for white blood cells), erythrocyte fragility test (for red blood cells), sodium lauryl sulphate  
34 method (for haemoglobin), microhematocrit method (for haematocrit), latex agglutination  
35 turbidimetry (for cystatin C), nephelometric immunoassay (for high-sensitivity C-reactive protein),  
36 immunoradiometric assay (for insulin-like growth factor-1), and chemiluminescence immunoassay  
37 (for vitamin B12).  
38  
39  
40  
41  
42  
43  
44  
45

#### 46 Anthropometric indices

47 The body mass index (kg/m<sup>2</sup>) is calculated as the body weight divided by the body height squared.  
48 Plastic tape is used to measure the calf circumference in the non-dominant leg.  
49  
50  
51

#### 52 Skin viscoelasticity

53 Skin viscoelasticity is evaluated using the Cutometer® dual MPA 580 (Courage + Khazaka electronic  
54 GmbH, Cologne, Germany), which measures the elasticity of the upper layer of the skin using negative  
55 pressure to induce mechanical deformation; such measurements are useful for quantitative evaluation  
56 of age-related changes in skin elasticity.<sup>[34 35]</sup> The displacement of the skin at the aperture of the  
57  
58  
59  
60

1  
2  
3  
4  
5  
6 Cutometer® probe is measured optically, and the resistance of the upper skin layer to the applied  
7 negative pressure and the ability to return to the original position are displayed as curves in real time.  
8 Skin viscoelasticity is assessed for the skin of the cheek. The participants are instructed to refrain from  
9 using makeup on the day of the assessment. The test is performed five times with 10-sec intervals, and  
10 the average result is retained.  
11  
12

#### 13 14 15 Habitual dietary intake and physical activity

16 Habitual dietary intake is measured using a brief-type self-administered diet history questionnaire,  
17 which has been validated for estimating the monthly energy intake and the intake of each nutrient  
18 factor in older adults.<sup>[36 37]</sup> These calculations are performed exclusively using software provided by  
19 Gender Medical Research Co., Ltd., Tokyo, Japan. Habitual physical activity levels are assessed using  
20 the International Physical Activity Questionnaire, which has good reliability and validity for  
21 estimating daily physical activity levels.<sup>[38 39]</sup> We calculate total scores and the scores for each of the  
22 four physical activity domains (leisure time, domestic and gardening, occupational, and transport-  
23 related physical activity). These evaluations are conducted to determine whether the participants  
24 changed their lifestyle patterns during the intervention period.  
25  
26  
27  
28  
29

#### 30 31 Functional capacity

32 Functional capacity is assessed in terms of the instrumental self-maintenance (five items), intellectual  
33 activities (four items), and social roles (four items) subscales of the TMIG index of competence. The  
34 validity and reliability of the face-to-face assessment of the TMIG index of competence have been  
35 demonstrated previously.<sup>[40]</sup> Participants are asked whether or not they are able to perform the function  
36 described by each item, to which they may answer either “yes” (able to do so, 1 point) or “no” (unable  
37 to do so, 0 points), for a maximum total score of 13 points, with a higher score indicating better  
38 functional capacity.  
39  
40  
41  
42  
43

#### 44 45 Health-related quality of life (HR-QoL)

46 HR-QoL is assessed using the World Health Organization-Five Well-Being Index, which has good  
47 validity for assessing mental condition in older adults and consists of five items representing mood in  
48 daily life over the preceding two weeks.<sup>[41]</sup> The participants are instructed to rate the frequency of the  
49 mood from 0 (never) to 5 (all the time), for a maximum score of 25 points, with a higher score  
50 indicating better mental condition.  
51  
52  
53  
54

#### 55 56 **Assessment of adverse events and adherence**

57 Any RT- or supplement-related adverse events occurring during the intervention period are recorded.  
58 The affected participants are free to discontinue the trial or continue other interventions (i.e.,  
59  
60

1  
2  
3  
4  
5  
6 participants with HMB- or placebo-related side effects may continue to perform RT, whereas  
7 participants with RT-related injuries may continue to take HMB or placebo). We assess the adherence  
8 to the intervention, including RT participation rate and adherence to the daily use of the assigned  
9 supplement (based on the participants' daily diary of study product intake). If a participant drops out  
10 from the program, the reasons are recorded.  
11  
12

### 13 14 15 **Outcome measures**

16 The primary outcome measure is muscle mass. Secondary outcome measures include muscle strength,  
17 physical performance, muscle thickness, muscle quality, blood counts, blood biochemistry, calf  
18 circumference, skin viscoelasticity, habitual dietary intake, habitual physical activity levels, functional  
19 capacity, and HR-QoL.  
20  
21

### 22 23 24 **Sample size**

25 This study is designed to detect a moderate effect size ( $f = 0.25$ ) for significant interactions between  
26 two factors (RT vs education and HMB vs placebo) regarding the longitudinal changes in outcomes.  
27 Detecting significant interactions would confirm our hypothesis that, compared to RT alone, HMB  
28 supplementation alone, and placebo, combined RT and HMB supplementation provides higher benefit  
29 regarding muscle mass, muscle strength, and physical performance. Setting the two-sided  $\alpha$ -error to  
30 0.05 and power to 80%, the minimum sample size required is 31 participants per group. Considering  
31 approximately 20% attrition, we aimed to enrol at most 160 participants. The power calculation was  
32 conducted using G\*Power version 3.1.9.2 for Windows (Heinrich-Heine-Universität Düsseldorf,  
33 Düsseldorf, Germany).<sup>[42]</sup>  
34  
35  
36  
37  
38  
39

### 40 41 42 **Statistical analysis**

43 To promote the collection of quality data, the collected data will be double-checked by the assessors,  
44 and a statistician will check the range of values. Between-group comparisons of baseline  
45 characteristics will be conducted using one-way analysis of variance (ANOVA) or the Kruskal-Wallis  
46 test for continuous variables, and the chi-square test for categorical variables. Continuous data will be  
47 expressed as mean and standard deviation or median and interquartile range. Differences in  
48 longitudinal mean changes in main and secondary outcomes from baseline to post-intervention will  
49 form the primary focus of the analysis. Two-way ANOVA for the changes in outcomes will be applied  
50 to test for interactions between two factors (RT vs education and HMB vs placebo). The main effects  
51 of RT (RT+HMB and RT+placebo vs education+HMB and education+placebo) and HMB (RT+HMB  
52 and education+HMB vs RT+placebo and education+placebo) will also be tested. Within-group  
53 changes will be analysed using paired t-tests, while between-group differences in the change in  
54 outcomes will be compared using one-way ANOVA. The Scheffe method will be applied for  
55  
56  
57  
58  
59  
60

relationships showing significance on one-way ANOVA. For subgroup analysis, the participants will be stratified according to sarcopenia status, as defined based on the Asian Working Group for Sarcopenia criteria. The intention-to-treat principle will be applied in all analyses. Missing data will be treated via multiple imputation, in which the Markov Chain Monte Carlo approach will be applied to generate 20 imputed data sets based on the baseline characteristics and the outcome variables. All statistical analyses will be performed using SPSS version 25.0 (IBM Corp., Armonk, NY, USA). *P*-values < 0.05 will be considered to indicate significance.

### **Patient and public involvement**

This study will be conducted without participant involvement. Participants will be not invited to comment on the study design, will not be consulted to define relevant outcomes or interpret the results, and will not be invited to contribute to the writing or editing of this paper for readability or accuracy.

### **ETHICS AND DISSEMINATION**

The study protocol was approved by the Ethics Committee of the TMIG, and will be conducted in agreement with the Declaration of Helsinki. The findings of this study will be presented at international academic congresses and published in peer-reviewed international journals. Upon publication in a journal, we will also make the findings available on the TMIG homepage.

### **DISCUSSION**

This study addresses the paucity of data regarding the effects of RT and/or HMB supplementation in older women with reduced muscle mass, and the findings will provide insight regarding the potential synergistic effect of RT and HMB supplementation on muscle mass, muscle strength, and physical performance. We will also examine the residual effects of such interventions over a 12-week observation period, as such findings may help understand the potential of non-pharmaceutical treatment for sarcopenia.

Literature reports regarding the individual effect of HMB supplementation on muscle properties and physical performance in older people are encouraging.<sup>[21 22 43]</sup> However, to our knowledge, only two studies have evaluated the combined effect of RT and HMB supplementation in older populations.<sup>[14 15]</sup> Specifically, Vukovich et al. enrolled 31 adults aged >70 years and reported significant muscle mass gain after 12 weeks of exercise with HMB supplementation but not after exercise with placebo (*P* for interaction, 0.08).<sup>[14]</sup> On the other hand, Stout et al. enrolled 36 adults aged >65 years and reported significant improvement in muscle quality, calculated as muscle strength relative to muscle mass, after 24 weeks of HMB supplementation alone (i.e., no exercise).<sup>[15]</sup> It remains unclear whether

1  
2  
3  
4  
5  
6 the combined program provides higher benefits. These previous studies had a relatively small sample  
7 size, which might increase  $\beta$ -error; moreover, the participants were relatively healthy and had almost  
8 normal muscle mass, suggesting that they may have benefited less from HMB supplementation. As  
9 completely controlled groups were not previously included, the potential synergy between RT and  
10 HMB supplementation remains unclear. The present study will address these limitations and serve as  
11 the first investigation of the acute and residual, independent and combined effects of RT and HMB  
12 supplementation, which will be conducted in a larger sample of older adults with reduced muscle mass.  
13 The randomized, double-blind, placebo-controlled design will minimize the risk of selection,  
14 performance, and detection bias, and will support the generalizability of the results. One limitation is  
15 that, in addition to machine-based RT, the intervention involves body weight, elastic band, and ankle  
16 weight RT, which does not provide objective information regarding muscle loading; on the other hand,  
17 such RT programs are more suitable for older adults and will be more feasible in daily practice.  
18 Another limitation is that all participants will be older women, which will preclude generalization of  
19 our findings to men.  
20  
21  
22  
23  
24  
25  
26  
27  
28  
29  
30  
31  
32  
33  
34  
35  
36  
37  
38  
39  
40  
41  
42  
43  
44  
45  
46  
47  
48  
49  
50  
51  
52  
53  
54  
55  
56  
57  
58  
59  
60

## DISCLOSURES

### Acknowledgments

We are grateful to the participants and the staff members of the Tokyo Metropolitan Institute of Gerontology.

### Authors' contributions

YO and HK conceived the study, designed the study protocol, participated in the coordination of the study (recruitment and screening), and wrote the manuscript. NK participated in the coordination of the study and helped manage data collection. KW and TK contributed to designing the study protocol, conducted the randomization, and have been maintaining allocation concealment. DM contributed to designing the study protocol and negotiated a contract with the provider of the intervention products. All authors read and approved the final manuscript. HK is principal investigator in this trial.

### Funding

This study is financially supported by Kyowa Co., Ltd., Tokyo, Japan (no grant number) and is being conducted as a joint research effort of the Tokyo Metropolitan Institute of Gerontology, University of Tsukuba, and Kyowa Co., Ltd.

### Competing interests

The intervention products (HMB and placebo supplements) were provided by Kyowa Co., Ltd. DM is employed by Kyowa Co., Ltd. The funder is not involved in subject recruitment, intervention, data collection, data analysis, or preparation of the manuscript.

### Patient consent

Obtained.

### Ethics approval

Approved by the Ethics Committee of the Tokyo Metropolitan Institute of Gerontology on 15 September 2017.

### Data sharing statement

Data collection is ongoing and will be handled anonymously. The results will be offered for publication in a peer-reviewed journal and, afterwards, will be available on the TMIG website.



**REFERENCES**

1. Cruz-Jentoft AJ, Baeyens JP, Bauer JM, et al. Sarcopenia: European consensus on definition and diagnosis: report of the European Working Group on Sarcopenia in Older People. *Age Ageing* 2010;39(4):412-23.
2. Landi F, Liperoti R, Russo A, et al. Sarcopenia as a risk factor for falls in elderly individuals: results from the iLSIRENTE study. *Clin Nutr* 2012;31(5):652-8.
3. Hirani V, Blyth F, Naganathan V, et al. Sarcopenia is associated with incident disability, institutionalization, and mortality in community-dwelling older men: the Concord Health and Ageing in Men Project. *J Am Med Dir Assoc* 2015;16(7):607-13.
4. Bianchi L, Ferrucci L, Cherubini A, et al. The predictive value of the EWGSOP definition of sarcopenia: results from the InCHIANTI study. *J Gerontol A Biol Sci Med Sci* 2016;71(2):259-64.
5. Cermak NM, Res PT, de Groot LC, et al. Protein supplementation augments the adaptive response of skeletal muscle to resistance-type exercise training: a meta-analysis. *Am J Clin Nutr* 2012;96(6):1454-64.
6. Malafarina V, Uriz-Otano F, Iniesta R, et al. Effectiveness of nutritional supplementation on muscle mass in treatment of sarcopenia in old age: a systematic review. *J Am Med Dir Assoc* 2013;14(1):10-7.
7. Liao CD, Tsao JY, Wu YT, et al. Effects of protein supplementation combined with resistance exercise on body composition and physical function in older adults: a systematic review and meta-analysis. *Am J Clin Nutr* 2017;106(4):1078-91.
8. Finger D, Goltz FR, Umpierre D, et al. Effects of protein supplementation in older adults undergoing resistance training: a systematic review and meta-analysis. *Sports Med* 2015;45(2):245-55.
9. Cruz-Jentoft AJ, Landi F, Schneider SM, et al. Prevalence of and interventions for sarcopenia in ageing adults: a systematic review. Report of the International Sarcopenia Initiative (EWGSOP and IWGS). *Age Ageing* 2014;43(6):748-59.
10. Wilson JM, Fitschen PJ, Campbell B, et al. International Society of Sports Nutrition Position Stand: beta-hydroxy-beta-methylbutyrate (HMB). *J Int Soc Sports Nutr* 2013;10(1):6.
11. Van Koeveering M, Nissen S. Oxidation of leucine and alpha-ketoisocaproate to beta-hydroxy-beta-methylbutyrate in vivo. *Am J Physiol* 1992;262(1 Pt 1):E27-31.
12. Fitschen PJ, Wilson GJ, Wilson JM, et al. Efficacy of beta-hydroxy-beta-methylbutyrate supplementation in elderly and clinical populations. *Nutrition* 2013;29(1):29-36.
13. Molfino A, Gioia G, Rossi Fanelli F, et al. Beta-hydroxy-beta-methylbutyrate supplementation in health and disease: a systematic review of randomized trials. *Amino Acids* 2013;45(6):1273-92.
14. Vukovich MD, Stubbs NB, Bohlken RM. Body composition in 70-year-old adults responds to dietary beta-hydroxy-beta-methylbutyrate similarly to that of young adults. *J Nutr* 2001;131(7):2049-52.
15. Stout JR, Smith-Ryan AE, Fukuda DH, et al. Effect of calcium beta-hydroxy-beta-methylbutyrate



- (CaHMB) with and without resistance training in men and women 65+yrs: a randomized, double-blind pilot trial. *Exp Gerontol* 2013;48(11):1303-10.
16. Chen LK, Liu LK, Woo J, et al. Sarcopenia in Asia: consensus report of the Asian Working Group for Sarcopenia. *J Am Med Dir Assoc* 2014;15(2):95-101.
17. Kim HK, Suzuki T, Saito K, et al. Effects of exercise and amino acid supplementation on body composition and physical function in community-dwelling elderly Japanese sarcopenic women: a randomized controlled trial. *J Am Geriatr Soc* 2012;60(1):16-23.
18. Kim H, Suzuki T, Kim M, et al. Effects of exercise and milk fat globule membrane (MFGM) supplementation on body composition, physical function, and hematological parameters in community-dwelling frail Japanese women: a randomized double blind, placebo-controlled, follow-up trial. *PLoS One* 2015;10(2):e0116256.
19. Kim H, Kim M, Kojima N, et al. Exercise and nutritional supplementation on community-dwelling elderly Japanese women with sarcopenic obesity: a randomized controlled trial. *J Am Med Dir Assoc* 2016;17(11):1011-19.
20. Wu H, Xia Y, Jiang J, et al. Effect of beta-hydroxy-beta-methylbutyrate supplementation on muscle loss in older adults: a systematic review and meta-analysis. *Arch Gerontol Geriatr* 2015;61(2):168-75.
21. Flakoll P, Sharp R, Baier S, et al. Effect of beta-hydroxy-beta-methylbutyrate, arginine, and lysine supplementation on strength, functionality, body composition, and protein metabolism in elderly women. *Nutrition* 2004;20(5):445-51.
22. Baier S, Johannsen D, Abumrad N, et al. Year-long changes in protein metabolism in elderly men and women supplemented with a nutrition cocktail of beta-hydroxy-beta-methylbutyrate (HMB), L-arginine, and L-lysine. *JPEN J Parenter Enteral Nutr* 2009;33(1):71-82.
23. Nissen S, Sharp RL, Panton L, et al.  $\beta$ -hydroxy- $\beta$ -methylbutyrate (HMB) supplementation in humans is safe and may decrease cardiovascular risk factors. *J Nutr* 2000;130(8):1937-45.
24. Janssen I, Baumgartner RN, Ross R, et al. Skeletal muscle cutpoints associated with elevated physical disability risk in older men and women. *Am J Epidemiol* 2004;159(4):413-21.
25. Kim M, Shinkai S, Murayama H, et al. Comparison of segmental multifrequency bioelectrical impedance analysis with dual-energy X-ray absorptiometry for the assessment of body composition in a community-dwelling older population. *Geriatr Gerontol Int* 2015;15(8):1013-22.
26. Kim M, Kim H. Accuracy of segmental multi-frequency bioelectrical impedance analysis for assessing whole-body and appendicular fat mass and lean soft tissue mass in frail women aged 75 years and older. *Eur J Clin Nutr* 2013;67(4):395-400.
27. Kojima N, Kim H, Saito K, et al. Association of knee-extension strength with instrumental activities of daily living in community-dwelling older adults. *Geriatr Gerontol Int* 2014;14(3):674-80.

- 1  
2  
3  
4  
5  
6 28. Kim H, Suzuki T, Yoshida Y, et al. Effectiveness of multidimensional exercises for the treatment of  
7 stress urinary incontinence in elderly community-dwelling Japanese women: a randomized,  
8 controlled, crossover trial. *J Am Geriatr Soc* 2007;55(12):1932-9.  
9
- 10 29. Shinkai S, Watanabe S, Kumagai S, et al. Walking speed as a good predictor for the onset of functional  
11 dependence in a Japanese rural community population. *Age Ageing* 2000;29(5):441-6.  
12
- 13 30. Podsiadlo D, Richardson S. The timed "Up & Go": a test of basic functional mobility for frail elderly  
14 persons. *J Am Geriatr Soc* 1991;39(2):142-8.  
15
- 16 31. Bohannon RW, Bubela DJ, Magasi SR, et al. Sit-to-stand test: performance and determinants across the  
17 age-span. *Isokinet Exerc Sci* 2010;18(4):235-40.  
18
- 19 32. Pillen S, Tak RO, Zwarts MJ, et al. Skeletal muscle ultrasound: correlation between fibrous tissue and  
20 echo intensity. *Ultrasound Med Biol* 2009;35(3):443-6.  
21
- 22 33. Nishihara K, Kawai H, Hayashi H, et al. Frequency analysis of ultrasonic echo intensities of the skeletal  
23 muscle in elderly and young individuals. *Clin Interv Aging* 2014;9:1471-8.  
24
- 25 34. Takema Y, Yorimoto Y, Kawai M, et al. Age-related changes in the elastic properties and thickness of  
26 human facial skin. *Br J Dermatol* 1994;131(5):641-8.  
27
- 28 35. Ryu HS, Joo YH, Kim SO, et al. Influence of age and regional differences on skin elasticity as measured  
29 by the Cutometer. *Skin Res Technol* 2008;14(3):354-8.  
30
- 31 36. Kobayashi S, Murakami K, Sasaki S, et al. Comparison of relative validity of food group intakes  
32 estimated by comprehensive and brief-type self-administered diet history questionnaires against  
33 16 d dietary records in Japanese adults. *Public Health Nutr* 2011;14(7):1200-11.  
34
- 35 37. Kobayashi S, Honda S, Murakami K, et al. Both comprehensive and brief self-administered diet history  
36 questionnaires satisfactorily rank nutrient intakes in Japanese adults. *J Epidemiol* 2012;22(2):151-  
37 9.  
38
- 39 38. Craig CL, Marshall AL, Sjoström M, et al. International physical activity questionnaire: 12-country  
40 reliability and validity. *Med Sci Sports Exerc* 2003;35(8):1381-95.  
41
- 42 39. Murase N, Katsumura T, Ueda C, et al. [Validity and reliability of Japanese version of International  
43 Physical Activity Questionnaire]. *Journal of Health and Welfare Statistics* 2002;49(11):1-9.  
44
- 45 40. Koyano W, Shibata H, Nakazato K, et al. Measurement of competence: reliability and validity of the  
46 TMIG Index of Competence. *Arch Gerontol Geriatr* 1991;13(2):103-16.  
47
- 48 41. Awata S, Bech P, Koizumi Y, et al. Validity and utility of the Japanese version of the WHO-Five Well-  
49 Being Index in the context of detecting suicidal ideation in elderly community residents. *Int*  
50 *Psychogeriatr* 2007;19(1):77-88.  
51
- 52 42. Faul F, Erdfelder E, Lang AG, et al. G\*Power 3: a flexible statistical power analysis program for the  
53 social, behavioral, and biomedical sciences. *Behav Res Methods* 2007;39(2):175-91.  
54
- 55 43. Berton L, Bano G, Carraro S, et al. Effect of oral beta-hydroxy-beta-methylbutyrate (HMB)  
56 supplementation on physical performance in healthy old women over 65 years: an open label  
57  
58  
59  
60

1  
2  
3  
4  
5 randomized controlled trial. *PLoS One* 2015;10(11):e0141757.  
6  
7  
8  
9  
10  
11  
12  
13  
14  
15  
16  
17  
18  
19  
20  
21  
22  
23  
24  
25  
26  
27  
28  
29  
30  
31  
32  
33  
34  
35  
36  
37  
38  
39  
40  
41  
42  
43  
44  
45  
46  
47  
48  
49  
50  
51  
52  
53  
54  
55  
56  
57  
58  
59  
60

For peer review only

**FIGURE LEGENDS**

Figure 1. Study flowchart covering participant recruitment and enrolment, group allocation, intervention, observation, and data analysis

A second intervention will be provided after the follow-up assessment, in agreement with ethical principles. However, only data from the highlighted fields will be included in the analysis.

For peer review only



Figure 1. Study flowchart covering participant recruitment and enrolment, group allocation, intervention, observation, and data analysis  
 A second intervention will be provided after the follow-up assessment, in agreement with ethical principles. However, only data from the highlighted fields will be included in the analysis.

68x68mm (300 x 300 DPI)



SPIRIT 2013 Checklist: Recommended items to address in a clinical trial protocol and related documents\*

| Section/item                                                        | Item No | Description                                                                                                                                                                                                                                                                                                                                                                    | Reference        |
|---------------------------------------------------------------------|---------|--------------------------------------------------------------------------------------------------------------------------------------------------------------------------------------------------------------------------------------------------------------------------------------------------------------------------------------------------------------------------------|------------------|
| <b>Administrative information</b>                                   |         |                                                                                                                                                                                                                                                                                                                                                                                |                  |
| Title                                                               | 1       | Descriptive title identifying the study design, population, interventions, and, if applicable, trial acronym                                                                                                                                                                                                                                                                   | pg. 1            |
| Trial registration                                                  | 2a      | Trial identifier and registry name. If not yet registered, name of intended registry                                                                                                                                                                                                                                                                                           | pg. 2            |
|                                                                     | 2b      | All items from the World Health Organization Trial Registration Data Set                                                                                                                                                                                                                                                                                                       | N/A              |
| Protocol version                                                    | 3       | Date and version identifier                                                                                                                                                                                                                                                                                                                                                    | N/A              |
| Funding                                                             | 4       | Sources and types of financial, material, and other support                                                                                                                                                                                                                                                                                                                    | pg. 14           |
| Roles and responsibilities                                          | 5a      | Names, affiliations, and roles of protocol contributors                                                                                                                                                                                                                                                                                                                        | pg. 1            |
|                                                                     | 5b      | Name and contact information for the trial sponsor                                                                                                                                                                                                                                                                                                                             | pg. 14           |
|                                                                     | 5c      | Role of study sponsor and funders, if any, in study design; collection, management, analysis, and interpretation of data; writing of the report; and the decision to submit the report for publication, including whether they will have ultimate authority over any of these activities                                                                                       | pg. 14           |
|                                                                     | 5d      | Composition, roles, and responsibilities of the coordinating centre, steering committee, endpoint adjudication committee, data management team, and other individuals or groups overseeing the trial, if applicable (see Item 21a for data monitoring committee)                                                                                                               | N/A              |
| <b>Introduction</b>                                                 |         |                                                                                                                                                                                                                                                                                                                                                                                |                  |
| Background and rationale                                            | 6a      | Description of research question and justification for undertaking the trial, including summary of relevant studies (published and unpublished) examining benefits and harms for each intervention                                                                                                                                                                             | pg. 3            |
|                                                                     | 6b      | Explanation for choice of comparators                                                                                                                                                                                                                                                                                                                                          | pg. 3            |
| Objectives                                                          | 7       | Specific objectives or hypotheses                                                                                                                                                                                                                                                                                                                                              | pg. 3            |
| Trial design                                                        | 8       | Description of trial design including type of trial (eg, parallel group, crossover, factorial, single group), allocation ratio, and framework (eg, superiority, equivalence, noninferiority, exploratory)                                                                                                                                                                      | pg. 3-4          |
| <b>Methods: Participants, interventions, and outcomes</b>           |         |                                                                                                                                                                                                                                                                                                                                                                                |                  |
| Study setting                                                       | 9       | Description of study settings (eg, community clinic, academic hospital) and list of countries where data will be collected. Reference to where list of study sites can be obtained                                                                                                                                                                                             | pg. 4, 5         |
| Eligibility criteria                                                | 10      | Inclusion and exclusion criteria for participants. If applicable, eligibility criteria for study centres and individuals who will perform the interventions (eg, surgeons, psychotherapists)                                                                                                                                                                                   | pg. 5, Fig. 1    |
| Interventions                                                       | 11a     | Interventions for each group with sufficient detail to allow replication, including how and when they will be administered                                                                                                                                                                                                                                                     | pg. 6, 7; Fig. 1 |
|                                                                     | 11b     | Criteria for discontinuing or modifying allocated interventions for a given trial participant (eg, drug dose change in response to harms, participant request, or improving/worsening disease)                                                                                                                                                                                 | pg. 11           |
|                                                                     | 11c     | Strategies to improve adherence to intervention protocols, and any procedures for monitoring adherence (eg, drug tablet return, laboratory tests)                                                                                                                                                                                                                              | pg. 7, 10, 11    |
|                                                                     | 11d     | Relevant concomitant care and interventions that are permitted or prohibited during the trial                                                                                                                                                                                                                                                                                  | pg. 6            |
| Outcomes                                                            | 12      | Primary, secondary, and other outcomes, including the specific measurement variable (eg, systolic blood pressure), analysis metric (eg, change from baseline, final value, time to event), method of aggregation (eg, median, proportion), and time point for each outcome. Explanation of the clinical relevance of chosen efficacy and harm outcomes is strongly recommended | pg. 11           |
| Participant timeline                                                | 13      | Time schedule of enrolment, interventions (including any run-ins and washouts), assessments, and visits for participants. A schematic diagram is highly recommended (see Figure)                                                                                                                                                                                               | pg. 5, Fig. 1    |
| Sample size                                                         | 14      | Estimated number of participants needed to achieve study objectives and how it was determined, including clinical and statistical assumptions supporting any sample size calculations                                                                                                                                                                                          | pg. 11           |
| Recruitment                                                         | 15      | Strategies for achieving adequate participant enrolment to reach target sample size                                                                                                                                                                                                                                                                                            | pg. 11           |
| <b>Methods: Assignment of interventions (for controlled trials)</b> |         |                                                                                                                                                                                                                                                                                                                                                                                |                  |

|    |                                                           |     |                                                                                                                                                                                                                                                                                                                                                                                                              |                     |
|----|-----------------------------------------------------------|-----|--------------------------------------------------------------------------------------------------------------------------------------------------------------------------------------------------------------------------------------------------------------------------------------------------------------------------------------------------------------------------------------------------------------|---------------------|
| 1  | Allocation:                                               |     |                                                                                                                                                                                                                                                                                                                                                                                                              |                     |
| 2  | Sequence generation                                       | 16a | Method of generating the allocation sequence (eg, computer-generated random numbers), and list of any factors for stratification. To reduce predictability of a random sequence, details of any planned restriction (eg, blocking) should be provided in a separate document that is unavailable to those who enrol participants or assign interventions                                                     | pg. 6               |
| 3  | Allocation concealment mechanism                          | 16b | Mechanism of implementing the allocation sequence (eg, central telephone; sequentially numbered, opaque, sealed envelopes), describing any steps to conceal the sequence until interventions are assigned                                                                                                                                                                                                    | pg. 6, 7            |
| 4  | Implementation                                            | 16c | Who will generate the allocation sequence, who will enrol participants, and who will assign participants to interventions                                                                                                                                                                                                                                                                                    | pg. 6, 7            |
| 5  | Blinding (masking)                                        | 17a | Who will be blinded after assignment to interventions (eg, trial participants, care providers, outcome assessors, data analysts), and how                                                                                                                                                                                                                                                                    | pg. 6, 7            |
| 6  |                                                           | 17b | If blinded, circumstances under which unblinding is permissible, and procedure for revealing a participant's allocated intervention during the trial                                                                                                                                                                                                                                                         | pg. 6               |
| 7  | <b>Methods: Data collection, management, and analysis</b> |     |                                                                                                                                                                                                                                                                                                                                                                                                              |                     |
| 8  | Data collection methods                                   | 18a | Plans for assessment and collection of outcome, baseline, and other trial data, including any related processes to promote data quality (eg, duplicate measurements, training of assessors) and a description of study instruments (eg, questionnaires, laboratory tests) along with their reliability and validity, if known. Reference to where data collection forms can be found, if not in the protocol | pg. 7-11            |
| 9  |                                                           | 18b | Plans to promote participant retention and complete follow-up, including list of any outcome data to be collected for participants who discontinue or deviate from intervention protocols                                                                                                                                                                                                                    | pg. 7, 10, 11       |
| 10 | Data management                                           | 19  | Plans for data entry, coding, security, and storage, including any related processes to promote data quality (eg, double data entry; range checks for data values). Reference to where details of data management procedures can be found, if not in the protocol                                                                                                                                            | pg. 11              |
| 11 | Statistical methods                                       | 20a | Statistical methods for analysing primary and secondary outcomes. Reference to where other details of the statistical analysis plan can be found, if not in the protocol                                                                                                                                                                                                                                     | pg. 11              |
| 12 |                                                           | 20b | Methods for any additional analyses (eg, subgroup and adjusted analyses)                                                                                                                                                                                                                                                                                                                                     | pg. 11-12           |
| 13 |                                                           | 20c | Definition of analysis population relating to protocol non-adherence (eg, as randomised analysis), and any statistical methods to handle missing data (eg, multiple imputation)                                                                                                                                                                                                                              | pg. 12              |
| 14 | <b>Methods: Monitoring</b>                                |     |                                                                                                                                                                                                                                                                                                                                                                                                              |                     |
| 15 | Data monitoring                                           | 21a | Composition of data monitoring committee (DMC); summary of its role and reporting structure; statement of whether it is independent from the sponsor and competing interests; and reference to where further details about its charter can be found, if not in the protocol. Alternatively, an explanation of why a DMC is not needed                                                                        | N/A                 |
| 16 |                                                           | 21b | Description of any interim analyses and stopping guidelines, including who will have access to these interim results and make the final decision to terminate the trial                                                                                                                                                                                                                                      | N/A                 |
| 17 | Harms                                                     | 22  | Plans for collecting, assessing, reporting, and managing solicited and spontaneously reported adverse events and other unintended effects of trial interventions or trial conduct                                                                                                                                                                                                                            | pg. 11              |
| 18 | Auditing                                                  | 23  | Frequency and procedures for auditing trial conduct, if any, and whether the process will be independent from investigators and the sponsor                                                                                                                                                                                                                                                                  | N/A                 |
| 19 | <b>Ethics and dissemination</b>                           |     |                                                                                                                                                                                                                                                                                                                                                                                                              |                     |
| 20 | Research ethics approval                                  | 24  | Plans for seeking research ethics committee/institutional review board (REC/IRB) approval                                                                                                                                                                                                                                                                                                                    | Approved; pg. 5, 12 |
| 21 | Protocol amendments                                       | 25  | Plans for communicating important protocol modifications (eg, changes to eligibility criteria, outcomes, analyses) to relevant parties (eg, investigators, REC/IRBs, trial participants, trial registries, journals, regulators)                                                                                                                                                                             | pg. 5               |
| 22 | Consent or assent                                         | 26a | Who will obtain informed consent or assent from potential trial participants or authorised surrogates, and how (see Item 32)                                                                                                                                                                                                                                                                                 | pg. 14              |
| 23 |                                                           | 26b | Additional consent provisions for collection and use of participant data and biological specimens in ancillary studies, if applicable                                                                                                                                                                                                                                                                        | N/A                 |
| 24 | Confidentiality                                           | 27  | How personal information about potential and enrolled participants will be collected, shared, and maintained in order to protect confidentiality before, during, and after the trial                                                                                                                                                                                                                         | pg. 5               |
| 25 | Declaration of interests                                  | 28  | Financial and other competing interests for principal investigators for the overall trial and each study site                                                                                                                                                                                                                                                                                                | pg. 14              |
| 26 | Access to data                                            | 29  | Statement of who will have access to the final trial dataset, and disclosure of contractual agreements that limit such access for investigators                                                                                                                                                                                                                                                              | pg. 14              |
| 27 | Ancillary and post-trial care                             | 30  | Provisions, if any, for ancillary and post-trial care, and for compensation to those who suffer harm from trial participation                                                                                                                                                                                                                                                                                | pg. 11              |

|    |                            |     |                                                                                                                                                                                                                                                                                     |
|----|----------------------------|-----|-------------------------------------------------------------------------------------------------------------------------------------------------------------------------------------------------------------------------------------------------------------------------------------|
| 1  |                            |     |                                                                                                                                                                                                                                                                                     |
| 2  | Dissemination policy       | 31a | Plans for investigators and sponsor to communicate trial results to participants, healthcare professionals, the public, and other relevant groups (eg, via publication, reporting in results databases, or other data sharing arrangements), including any publication restrictions |
| 3  |                            |     | pg. 14                                                                                                                                                                                                                                                                              |
| 4  |                            | 31b | Authorship eligibility guidelines and any intended use of professional writers                                                                                                                                                                                                      |
| 5  |                            | 31c | Plans, if any, for granting public access to the full protocol, participant-level dataset, and statistical code                                                                                                                                                                     |
| 6  |                            |     | pg. 14                                                                                                                                                                                                                                                                              |
| 7  | <b>Appendices</b>          |     |                                                                                                                                                                                                                                                                                     |
| 8  | Informed consent materials | 32  | Model consent form and other related documentation given to participants and authorised surrogates                                                                                                                                                                                  |
| 9  |                            |     | pg. 5                                                                                                                                                                                                                                                                               |
| 10 | Biological specimens       | 33  | Plans for collection, laboratory evaluation, and storage of biological specimens for genetic or molecular analysis in the current trial and for future use in ancillary studies, if applicable                                                                                      |
| 11 |                            |     | N/A                                                                                                                                                                                                                                                                                 |

12 \*It is strongly recommended that this checklist be read in conjunction with the SPIRIT 2013  
 13 Explanation & Elaboration for important clarification on the items. Amendments to the  
 14 protocol should be tracked and dated. The SPIRIT checklist is copyrighted by the SPIRIT  
 15 Group under the Creative Commons "[Attribution-NonCommercial-NoDerivs 3.0 Unported](https://creativecommons.org/licenses/by-nc-nd/3.0/)"  
 16 license.  
 17  
 18  
 19  
 20  
 21  
 22  
 23  
 24  
 25  
 26  
 27  
 28  
 29  
 30  
 31  
 32  
 33  
 34  
 35  
 36  
 37  
 38  
 39  
 40  
 41  
 42  
 43  
 44  
 45  
 46  
 47  
 48  
 49  
 50  
 51  
 52  
 53  
 54  
 55  
 56  
 57  
 58  
 59  
 60
